# Supplementary material for: The Pied Piper: A Parasitic Beetle’s Melodies Modulate Ant Behaviours
Source: PLoS One. 2015 Jul 8;10(7):e0130541. doi: 10.1371/journal.pone.0130541 (PMC4496082; doi:10.1371/journal.pone.0130541)
Supplement: S1 Dataset — (XLSX) [file pone.0130541.s001.xlsx]

## Sheet: Playback
S_C	Sound	Nest	Walking	Antennate	Guarding	Digging	Stay
S	Pt	1	6	7	0	1	0
S	W	1	6	2	0	0	0
S	Q	1	4	4	2	0	0
S	Pp	1	6	6	0	0	0
S	S	1	4	3	0	0	0
C	Wno	1	2	0	0	0	0
C	Sil	1	1	0	0	0	0
S	Pt	2	3	3	0	0	0
S	W	2	3	2	0	0	0
S	Q	2	3	4	1	0	1
S	Pp	2	2	2	1	0	0
S	S	2	4	3	0	0	0
C	Wno	2	0	0	0	0	0
C	Sil	2	0	0	0	0	0
S	Pt	3	6	3	0	0	1
S	W	3	6	4	0	0	0
S	Q	3	5	4	1	0	1
S	Pp	3	6	5	2	0	0
S	S	3	4	2	0	0	0
C	Wno	3	1	0	0	0	0
C	Sil	3	1	0	0	0	0
S	Pt	4	5	3	0	0	0
S	W	4	6	2	0	0	0
S	Q	4	3	3	0	1	1
S	Pp	4	6	2	0	0	0
S	S	4	11	4	0	0	0
C	Wno	4	2	1	0	0	0
C	Sil	4	1	0	0	0	0
S	Pt	5	5	7	5	0	0
S	W	5	4	1	0	0	0
S	Q	5	3	3	1	0	0
S	Pp	5	2	3	0	0	0
S	S	5	3	4	0	0	0
C	Wno	5	2	0	0	0	0
C	Sil	5	1	0	0	0	0
S	Pt	6	2	6	1	0	0
S	W	6	3	3	0	0	1
S	Q	6	12	6	3	1	0
S	Pp	6	5	5	2	0	0
S	S	6	5	2	0	0	0
C	Wno	6	1	0	0	0	0
C	Sil	6	2	0	0	0	0
S	Pt	7	6	5	0	0	0
S	W	7	6	4	0	0	0
S	Q	7	8	8	2	0	0
S	Pp	7	5	5	0	0	0
S	S	7	4	5	0	0	0
C	Wno	7	1	0	0	0	0
C	Sil	7	2	0	0	0	0
S	Pt	8	6	6	3	1	1
S	W	8	2	1	0	0	0
S	Q	8	7	5	0	0	1
S	Pp	8	4	4	0	0	0
S	S	8	2	3	0	0	0
C	Wno	8	2	1	0	0	0
C	Sil	8	0	0	0	0	0
S	Pt	9	3	3	0	0	0
S	W	9	3	2	0	2	0
S	Q	9	3	5	1	0	1
S	Pp	9	3	8	2	0	1
S	S	9	3	4	0	0	1
C	Wno	9	1	0	0	0	0
C	Sil	9	0	0	0	0	0
S	Pt	10	3	6	0	1	1
S	W	10	2	3	0	0	2
S	Q	10	3	3	0	1	0
S	Pp	10	4	2	0	0	0
S	S	10	4	2	0	0	0
C	Wno	10	2	2	0	0	0
C	Sil	10	1	1	0	0	0
S	Pt	1	6	3	0	0	0
S	W	1	7	2	0	0	0
S	Q	1	2	3	2	0	1
S	Pp	1	4	5	1	1	1
S	S	1	3	2	0	0	0
C	Wno	1	2	0	0	0	0
C	Sil	1	1	0	0	0	0
S	Pt	2	5	3	0	1	1
S	W	2	4	2	0	0	0
S	Q	2	3	4	1	0	2
S	Pp	2	4	2	1	0	1
S	S	2	5	3	0	0	0
C	Wno	2	0	0	0	0	0
C	Sil	2	1	0	0	0	0
S	Pt	3	2	4	1	0	0
S	W	3	3	2	0	0	0
S	Q	3	3	4	1	0	2
S	Pp	3	3	2	1	0	1
S	S	3	3	4	0	0	0
C	Wno	3	1	1	0	0	0
C	Sil	3	0	0	0	0	0
S	Pt	4	3	5	0	0	0
S	W	4	3	2	0	0	0
S	Q	4	4	4	1	0	0
S	Pp	4	4	2	0	0	0
S	S	4	3	1	0	0	0
C	Wno	4	1	0	0	0	0
C	Sil	4	0	1	0	0	0
S	Pt	5	9	4	1	0	0
S	W	5	4	3	0	0	0
S	Q	5	8	7	1	1	0
S	Pp	5	7	6	4	1	0
S	S	5	6	1	0	0	0
C	Wno	5	3	0	0	0	0
C	Sil	5	1	0	0	0	0
S	Pt	6	5	3	0	0	0
S	W	6	5	5	0	0	0
S	Q	6	5	5	1	0	0
S	Pp	6	5	3	1	0	0
S	S	6	3	2	0	0	0
C	Wno	6	1	0	0	0	0
C	Sil	6	0	0	0	0	0
S	Pt	7	5	5	1	0	0
S	W	7	4	7	0	0	0
S	Q	7	5	2	1	0	0
S	Pp	7	5	3	1	0	0
S	S	7	3	2	0	0	0
C	Wno	7	1	0	0	0	0
C	Sil	7	0	0	0	0	0
S	Pt	8	6	3	0	1	0
S	W	8	7	1	0	0	0
S	Q	8	3	3	2	0	0
S	Pp	8	3	4	1	0	0
S	S	8	3	4	0	0	0
C	Wno	8	1	1	0	0	0
C	Sil	8	0	0	0	0	0
S	Pt	9	4	4	0	1	1
S	W	9	3	1	0	0	0
S	Q	9	5	3	2	0	0
S	Pp	9	6	5	1	0	0
S	S	9	5	3	0	0	0
C	Wno	9	2	0	0	0	0
C	Sil	9	1	0	0	0	0
S	Pt	10	4	5	0	0	0
S	W	10	3	2	0	0	0
S	Q	10	11	9	3	0	1
S	Pp	10	2	3	0	0	0
S	S	10	7	3	0	0	0
C	Wno	10	2	1	0	0	0
C	Sil	10	2	0	0	0	0

## Sheet: Univariate (Pulse)
Pulse	Type	Individual	Ant/Paussus
0.041	Pa	12	p
0.033	Pa	12	p
0.055	Pa	12	p
0.068	Pa	12	p
0.029	Pa	12	p
0.029	Pa	12	p
0.13	Pa	12	p
0.085	Pa	12	p
0.032	Pa	12	p
0.16	Pa	12	p
0.035	Pa	12	p
0.021	Pa	12	p
0.036	Pa	12	p
0.031	Pa	12	p
0.037	Pa	12	p
0.016	Pb	12	p
0.013	Pb	12	p
0.012	Pb	12	p
0.012	Pb	12	p
0.012	Pb	12	p
0.012	Pb	12	p
0.014	Pb	12	p
0.014	Pb	12	p
0.013	Pb	12	p
0.025	Pb	12	p
0.012	Pb	12	p
0.02	Pb	12	p
0.026	Pb	12	p
0.033	Pb	12	p
0.0122	Pc	12	p
0.077	Pc	12	p
0.07	Pc	12	p
0.103	Pc	12	p
0.069	Pc	12	p
0.106	Pc	12	p
0.0106	Pc	12	p
0.082	Pc	12	p
0.079	Pc	12	p
0.093	Pc	12	p
0.112	Pc	12	p
0.107	Pc	12	p
0.083	Pc	12	p
0.123	Pc	12	p
0.109	Pc	12	p
0.0235	Pc	12	p
0.091	Pc	12	p
0.053	Pc	12	p
0.073	Pc	12	p
0.091	Pc	12	p
0.077	Pc	12	p
0.076	Pc	12	p
0.072	Pc	12	p
0.03	Pc	12	p
0.04	Pc	12	p
0.038	Pc	12	p
0.017	Pc	12	p
0.025	Pc	12	p
0.021	Pc	12	p
0.037	Pa	13	p
0.069	Pa	13	p
0.065	Pa	13	p
0.063	Pa	13	p
0.023	Pa	13	p
0.022	Pa	13	p
0.18	Pa	13	p
0.088	Pa	13	p
0.03	Pa	13	p
0.16	Pa	13	p
0.03	Pa	13	p
0.021	Pa	13	p
0.037	Pa	13	p
0.027	Pa	13	p
0.04	Pa	13	p
0.02	Pb	13	p
0.014	Pb	13	p
0.014	Pb	13	p
0.012	Pb	13	p
0.013	Pb	13	p
0.012	Pb	13	p
0.012	Pb	13	p
0.014	Pb	13	p
0.017	Pb	13	p
0.018	Pb	13	p
0.012	Pb	13	p
0.014	Pb	13	p
0.013	Pb	13	p
0.013	Pb	13	p
0.0144	Pc	13	p
0.062	Pc	13	p
0.088	Pc	13	p
0.077	Pc	13	p
0.097	Pc	13	p
0.089	Pc	13	p
0.097	Pc	13	p
0.096	Pc	13	p
0.09	Pc	13	p
0.012	Pc	13	p
0.108	Pc	13	p
0.114	Pc	13	p
0.094	Pc	13	p
0.092	Pc	13	p
0.126	Pc	13	p
0.108	Pc	13	p
0.109	Pc	13	p
0.122	Pc	13	p
0.074	Pc	13	p
0.02	Pc	13	p
0.094	Pc	13	p
0.11	Pc	13	p
0.092	Pc	13	p
0.032	Pc	13	p
0.031	Pc	13	p
0.032	Pc	13	p
0.028	Pc	13	p
0.04	Pa	14	p
0.061	Pa	14	p
0.044	Pa	14	p
0.067	Pa	14	p
0.067	Pa	14	p
0.03	Pa	14	p
0.123	Pa	14	p
0.0827	Pa	14	p
0.035	Pa	14	p
0.19	Pa	14	p
0.024	Pa	14	p
0.027	Pa	14	p
0.031	Pa	14	p
0.031	Pa	14	p
0.037	Pa	14	p
0.013	Pb	14	p
0.015	Pb	14	p
0.034	Pb	14	p
0.012	Pb	14	p
0.012	Pb	14	p
0.013	Pb	14	p
0.014	Pb	14	p
0.012	Pb	14	p
0.014	Pb	14	p
0.014	Pb	14	p
0.012	Pb	14	p
0.016	Pb	14	p
0.012	Pb	14	p
0.013	Pb	14	p
0.094	Pc	14	p
0.077	Pc	14	p
0.069	Pc	14	p
0.0101	Pc	14	p
0.107	Pc	14	p
0.073	Pc	14	p
0.0102	Pc	14	p
0.081	Pc	14	p
0.063	Pc	14	p
0.098	Pc	14	p
0.099	Pc	14	p
0.087	Pc	14	p
0.07	Pc	14	p
0.102	Pc	14	p
0.125	Pc	14	p
0.119	Pc	14	p
0.117	Pc	14	p
0.093	Pc	14	p
0.117	Pc	14	p
0.0157	Pc	14	p
0.095	Pc	14	p
0.08	Pc	14	p
0.063	Pc	14	p
0.026	Pc	14	p
0.034	Pc	14	p
0.033	Pc	14	p
0.028	Pc	14	p
0.04	Pa	15	p
0.06	Pa	15	p
0.046	Pa	15	p
0.026	Pa	15	p
0.067	Pa	15	p
0.026	Pa	15	p
0.134	Pa	15	p
0.0827	Pa	15	p
0.032	Pa	15	p
0.26	Pa	15	p
0.029	Pa	15	p
0.024	Pa	15	p
0.03	Pa	15	p
0.033	Pa	15	p
0.037	Pa	15	p
0.016	Pb	15	p
0.013	Pb	15	p
0.022	Pb	15	p
0.021	Pb	15	p
0.011	Pb	15	p
0.012	Pb	15	p
0.015	Pb	15	p
0.012	Pb	15	p
0.014	Pb	15	p
0.024	Pb	15	p
0.013	Pb	15	p
0.014	Pb	15	p
0.011	Pb	15	p
0.0188	Pc	15	p
0.0176	Pc	15	p
0.076	Pc	15	p
0.01	Pc	15	p
0.0117	Pc	15	p
0.087	Pc	15	p
0.078	Pc	15	p
0.09	Pc	15	p
0.081	Pc	15	p
0.042	Pc	15	p
0.0127	Pc	15	p
0.124	Pc	15	p
0.076	Pc	15	p
0.103	Pc	15	p
0.086	Pc	15	p
0.098	Pc	15	p
0.139	Pc	15	p
0.06	Pc	15	p
0.106	Pc	15	p
0.095	Pc	15	p
0.078	Pc	15	p
0.086	Pc	15	p
0.084	Pc	15	p
0.081	Pc	15	p
0.073	Pc	15	p
0.034	Pc	15	p
0.071	Pc	15	p
0.04	Pc	15	p
0.036	Pa	16	p
0.06	Pa	16	p
0.048	Pa	16	p
0.051	Pa	16	p
0.067	Pa	16	p
0.027	Pa	16	p
0.132	Pa	16	p
0.082	Pa	16	p
0.021	Pa	16	p
0.16	Pa	16	p
0.026	Pa	16	p
0.019	Pa	16	p
0.025	Pa	16	p
0.033	Pa	16	p
0.028	Pa	16	p
0.014	Pb	16	p
0.014	Pb	16	p
0.015	Pb	16	p
0.012	Pb	16	p
0.012	Pb	16	p
0.012	Pb	16	p
0.012	Pb	16	p
0.015	Pb	16	p
0.025	Pb	16	p
0.013	Pb	16	p
0.015	Pb	16	p
0.011	Pb	16	p
0.012	Pb	16	p
0.0129	Pc	16	p
0.065	Pc	16	p
0.088	Pc	16	p
0.084	Pc	16	p
0.0108	Pc	16	p
0.111	Pc	16	p
0.092	Pc	16	p
0.078	Pc	16	p
0.091	Pc	16	p
0.097	Pc	16	p
0.0117	Pc	16	p
0.0115	Pc	16	p
0.0178	Pc	16	p
0.056	Pc	16	p
0.111	Pc	16	p
0.097	Pc	16	p
0.108	Pc	16	p
0.089	Pc	16	p
0.085	Pc	16	p
0.084	Pc	16	p
0.0166	Pc	16	p
0.109	Pc	16	p
0.079	Pc	16	p
0.08	Pc	16	p
0.097	Pc	16	p
0.035	Pa	17	p
0.069	Pa	17	p
0.069	Pa	17	p
0.063	Pa	17	p
0.069	Pa	17	p
0.024	Pa	17	p
0.131	Pa	17	p
0.087	Pa	17	p
0.019	Pa	17	p
0.23	Pa	17	p
0.029	Pa	17	p
0.021	Pa	17	p
0.026	Pa	17	p
0.028	Pa	17	p
0.025	Pa	17	p
0.014	Pb	17	p
0.018	Pb	17	p
0.012	Pb	17	p
0.013	Pb	17	p
0.013	Pb	17	p
0.014	Pb	17	p
0.013	Pb	17	p
0.016	Pb	17	p
0.014	Pb	17	p
0.015	Pb	17	p
0.023	Pb	17	p
0.012	Pb	17	p
0.013	Pb	17	p
0.082	Pc	17	p
0.085	Pc	17	p
0.071	Pc	17	p
0.0147	Pc	17	p
0.077	Pc	17	p
0.087	Pc	17	p
0.077	Pc	17	p
0.0119	Pc	17	p
0.08	Pc	17	p
0.074	Pc	17	p
0.0114	Pc	17	p
0.09	Pc	17	p
0.0198	Pc	17	p
0.128	Pc	17	p
0.092	Pc	17	p
0.108	Pc	17	p
0.0169	Pc	17	p
0.091	Pc	17	p
0.138	Pc	17	p
0.08	Pc	17	p
0.078	Pc	17	p
0.102	Pc	17	p
0.102	Pc	17	p
0.103	Pc	17	p
0.083	Pc	17	p
0.03	Pa	18	p
0.037	Pa	18	p
0.064	Pa	18	p
0.02	Pa	18	p
0.065	Pa	18	p
0.028	Pa	18	p
0.139	Pa	18	p
0.087	Pa	18	p
0.032	Pa	18	p
0.2	Pa	18	p
0.035	Pa	18	p
0.022	Pa	18	p
0.031	Pa	18	p
0.039	Pa	18	p
0.018	Pb	18	p
0.016	Pb	18	p
0.012	Pb	18	p
0.011	Pb	18	p
0.015	Pb	18	p
0.012	Pb	18	p
0.019	Pb	18	p
0.015	Pb	18	p
0.015	Pb	18	p
0.013	Pb	18	p
0.013	Pb	18	p
0.014	Pb	18	p
0.013	Pb	18	p
0.012	Pb	18	p
0.07	Pc	18	p
0.099	Pc	18	p
0.074	Pc	18	p
0.093	Pc	18	p
0.0101	Pc	18	p
0.0131	Pc	18	p
0.075	Pc	18	p
0.0124	Pc	18	p
0.094	Pc	18	p
0.092	Pc	18	p
0.072	Pc	18	p
0.0119	Pc	18	p
0.0107	Pc	18	p
0.11	Pc	18	p
0.105	Pc	18	p
0.098	Pc	18	p
0.103	Pc	18	p
0.085	Pc	18	p
0.072	Pc	18	p
0.084	Pc	18	p
0.112	Pc	18	p
0.079	Pc	18	p
0.086	Pc	18	p
0.103	Pc	18	p
0.085	Pc	18	p
0.031	Pa	19	p
0.032	Pa	19	p
0.06	Pa	19	p
0.027	Pa	19	p
0.066	Pa	19	p
0.023	Pa	19	p
0.036	Pa	19	p
0.046	Pa	19	p
0.086	Pa	19	p
0.28	Pa	19	p
0.032	Pa	19	p
0.031	Pa	19	p
0.031	Pa	19	p
0.03	Pa	19	p
0.013	Pb	19	p
0.013	Pb	19	p
0.013	Pb	19	p
0.01	Pb	19	p
0.014	Pb	19	p
0.012	Pb	19	p
0.017	Pb	19	p
0.012	Pb	19	p
0.013	Pb	19	p
0.014	Pb	19	p
0.012	Pb	19	p
0.023	Pb	19	p
0.012	Pb	19	p
0.014	Pb	19	p
0.082	Pc	19	p
0.087	Pc	19	p
0.093	Pc	19	p
0.076	Pc	19	p
0.012	Pc	19	p
0.013	Pc	19	p
0.085	Pc	19	p
0.087	Pc	19	p
0.085	Pc	19	p
0.077	Pc	19	p
0.092	Pc	19	p
0.0112	Pc	19	p
0.103	Pc	19	p
0.079	Pc	19	p
0.088	Pc	19	p
0.0117	Pc	19	p
0.072	Pc	19	p
0.028	Pc	19	p
0.109	Pc	19	p
0.109	Pc	19	p
0.035	Pa	20	p
0.032	Pa	20	p
0.06	Pa	20	p
0.032	Pa	20	p
0.069	Pa	20	p
0.15	Pa	20	p
0.029	Pa	20	p
0.037	Pa	20	p
0.087	Pa	20	p
0.043	Pa	20	p
0.022	Pa	20	p
0.036	Pa	20	p
0.037	Pa	20	p
0.039	Pa	20	p
0.018	Pb	20	p
0.015	Pb	20	p
0.016	Pb	20	p
0.012	Pb	20	p
0.012	Pb	20	p
0.013	Pb	20	p
0.015	Pb	20	p
0.015	Pb	20	p
0.015	Pb	20	p
0.016	Pb	20	p
0.013	Pb	20	p
0.013	Pb	20	p
0.014	Pb	20	p
0.024	Pb	20	p
0.0204	Pc	20	p
0.0134	Pc	20	p
0.081	Pc	20	p
0.087	Pc	20	p
0.107	Pc	20	p
0.075	Pc	20	p
0.0109	Pc	20	p
0.0105	Pc	20	p
0.082	Pc	20	p
0.101	Pc	20	p
0.058	Pc	20	p
0.0118	Pc	20	p
0.0132	Pc	20	p
0.088	Pc	20	p
0.078	Pc	20	p
0.096	Pc	20	p
0.113	Pc	20	p
0.114	Pc	20	p
0.126	Pc	20	p
0.067	Pc	20	p
0.014	Pc	20	p
0.057	q	1	a
0.075	q	1	a
0.07	q	1	a
0.082	q	1	a
0.071	q	1	a
0.063	q	1	a
0.069	q	1	a
0.102	q	1	a
0.067	q	1	a
0.066	q	1	a
0.067	q	1	a
0.062	q	1	a
0.072	q	1	a
0.038	q	1	a
0.081	q	2	a
0.082	q	2	a
0.071	q	2	a
0.082	q	2	a
0.095	q	2	a
0.077	q	2	a
0.09	q	2	a
0.071	q	2	a
0.051	q	2	a
0.063	q	2	a
0.02	q	2	a
0.061	q	2	a
0.079	q	2	a
0.085	q	3	a
0.024	q	3	a
0.073	q	3	a
0.061	q	3	a
0.067	q	3	a
0.091	q	3	a
0.061	q	3	a
0.077	q	3	a
0.066	q	3	a
0.067	q	3	a
0.083	q	3	a
0.025	q	3	a
0.048	q	3	a
0.056	q	3	a
0.055	q	3	a
0.043	q	4	a
0.062	q	4	a
0.104	q	4	a
0.052	q	4	a
0.094	q	4	a
0.069	q	4	a
0.07	q	4	a
0.071	q	4	a
0.071	q	4	a
0.079	q	4	a
0.039	q	4	a
0.078	q	4	a
0.089	q	4	a
0.05	q	5	a
0.075	q	5	a
0.057	q	5	a
0.053	q	5	a
0.061	q	5	a
0.058	q	5	a
0.013	q	5	a
0.08	q	5	a
0.061	q	5	a
0.107	q	5	a
0.055	q	5	a
0.051	s	6	a
0.073	s	6	a
0.056	s	6	a
0.067	s	6	a
0.044	s	6	a
0.058	s	6	a
0.08	s	6	a
0.049	s	6	a
0.076	s	6	a
0.063	s	6	a
0.064	s	6	a
0.067	s	6	a
0.063	s	6	a
0.063	s	6	a
0.074	s	6	a
0.061	s	6	a
0.049	s	6	a
0.064	s	6	a
0.072	s	6	a
0.061	s	6	a
0.073	s	6	a
0.067	s	6	a
0.073	s	6	a
0.048	s	7	a
0.066	s	7	a
0.044	s	7	a
0.077	s	7	a
0.055	s	7	a
0.076	s	7	a
0.051	s	7	a
0.118	s	7	a
0.145	s	7	a
0.065	s	7	a
0.083	s	7	a
0.079	s	7	a
0.014	s	7	a
0.068	s	7	a
0.047	s	7	a
0.053	s	7	a
0.05	s	7	a
0.076	s	7	a
0.043	s	7	a
0.077	s	7	a
0.081	s	7	a
0.07	s	8	a
0.028	s	8	a
0.066	s	8	a
0.072	s	8	a
0.057	s	8	a
0.081	s	8	a
0.064	s	8	a
0.069	s	8	a
0.053	s	8	a
0.081	s	8	a
0.062	s	8	a
0.065	s	8	a
0.057	s	8	a
0.059	s	8	a
0.057	s	8	a
0.069	s	8	a
0.062	s	8	a
0.078	s	8	a
0.065	s	8	a
0.076	s	8	a
0.017	s	8	a
0.083	s	9	a
0.114	s	9	a
0.075	s	9	a
0.091	s	9	a
0.054	s	9	a
0.058	s	9	a
0.065	s	9	a
0.05	s	9	a
0.07	s	9	a
0.055	s	9	a
0.048	s	9	a
0.049	s	9	a
0.054	s	9	a
0.078	s	9	a
0.053	s	9	a
0.072	s	9	a
0.066	s	9	a
0.053	s	9	a
0.067	s	9	a
0.071	s	9	a
0.067	s	9	a
0.06	s	10	a
0.061	s	10	a
0.057	s	10	a
0.054	s	10	a
0.079	s	10	a
0.055	s	10	a
0.079	s	10	a
0.063	s	10	a
0.019	s	10	a
0.04	s	10	a
0.079	s	10	a
0.049	s	10	a
0.068	s	10	a
0.064	s	10	a
0.055	s	10	a
0.059	s	10	a
0.169	s	10	a
0.084	s	10	a
0.062	s	10	a
0.026	s	10	a
0.083	s	10	a
0.049	w	11	a
0.059	w	11	a
0.055	w	11	a
0.051	w	11	a
0.066	w	11	a
0.048	w	11	a
0.052	w	11	a
0.065	w	11	a
0.048	w	11	a
0.07	w	11	a
0.047	w	11	a
0.068	w	11	a
0.062	w	11	a
0.066	w	11	a
0.058	w	11	a
0.039	w	11	a
0.066	w	11	a
0.046	w	11	a
0.064	w	11	a
0.046	w	11	a
0.05	w	12	a
0.065	w	12	a
0.081	w	12	a
0.056	w	12	a
0.074	w	12	a
0.052	w	12	a
0.074	w	12	a
0.049	w	12	a
0.076	w	12	a
0.05	w	12	a
0.071	w	12	a
0.06	w	12	a
0.049	w	12	a
0.06	w	12	a
0.044	w	12	a
0.04	w	12	a
0.058	w	12	a
0.056	w	12	a
0.054	w	12	a
0.048	w	12	a
0.067	w	12	a
0.06	w	13	a
0.062	w	13	a
0.047	w	13	a
0.071	w	13	a
0.066	w	13	a
0.046	w	13	a
0.062	w	13	a
0.051	w	13	a
0.066	w	13	a
0.047	w	13	a
0.059	w	13	a
0.041	w	13	a
0.058	w	13	a
0.056	w	13	a
0.06	w	13	a
0.044	w	13	a
0.044	w	13	a
0.067	w	13	a
0.06	w	13	a
0.046	w	13	a
0.042	w	14	a
0.034	w	14	a
0.044	w	14	a
0.073	w	14	a
0.038	w	14	a
0.058	w	14	a
0.048	w	14	a
0.067	w	14	a
0.048	w	14	a
0.064	w	14	a
0.061	w	14	a
0.047	w	14	a
0.061	w	14	a
0.059	w	14	a
0.064	w	14	a
0.046	w	14	a
0.057	w	14	a
0.061	w	14	a
0.065	w	14	a
0.064	w	14	a
0.063	w	14	a
0.068	w	15	a
0.049	w	15	a
0.057	w	15	a
0.056	w	15	a
0.077	w	15	a
0.044	w	15	a
0.056	w	15	a
0.046	w	15	a
0.054	w	15	a
0.034	w	15	a
0.04	w	15	a
0.049	w	15	a
0.072	w	15	a
0.055	w	15	a
0.071	w	15	a
0.046	w	15	a
0.061	w	15	a
0.05	w	15	a
0.107	w	15	a
0.054	w	15	a
0.061	w	15	a

## Sheet: Univariate (Freq)
Freq	Type	Individual	Ant/Paussus
979	q	1	a
1344	q	1	a
1242	q	1	a
1308	q	1	a
1375	q	1	a
1074	q	1	a
1398	q	1	a
1026	q	1	a
1541	q	1	a
1262	q	1	a
1471	q	1	a
1623	q	1	a
1388	q	1	a
1201	q	1	a
1349	q	2	a
1329	q	2	a
1180	q	2	a
1361	q	2	a
1287	q	2	a
1470	q	2	a
1609	q	2	a
1580	q	2	a
1355	q	2	a
1636	q	2	a
1254	q	2	a
1475	q	2	a
1639	q	2	a
1203	q	3	a
989	q	3	a
1222	q	3	a
1435	q	3	a
1597	q	3	a
1495	q	3	a
1525	q	3	a
1437	q	3	a
1564	q	3	a
1415	q	3	a
1592	q	3	a
1583	q	3	a
1542	q	3	a
1049	q	3	a
1615	q	3	a
948	q	4	a
1557	q	4	a
1525	q	4	a
1563	q	4	a
1664	q	4	a
1475	q	4	a
1306	q	4	a
1522	q	4	a
1429	q	4	a
1379	q	4	a
1495	q	4	a
1317	q	4	a
1261	q	4	a
1119	q	5	a
1644	q	5	a
1495	q	5	a
1338	q	5	a
1327	q	5	a
1615	q	5	a
1230	q	5	a
1364	q	5	a
1529	q	5	a
1439	q	5	a
1362	q	5	a
1407	s	6	a
1938	s	6	a
712	s	6	a
1902	s	6	a
1545	s	6	a
917	s	6	a
1047	s	6	a
1459	s	6	a
992	s	6	a
1389	s	6	a
822	s	6	a
827	s	6	a
1318	s	6	a
1595	s	6	a
1975	s	6	a
2035	s	6	a
2229	s	6	a
1166	s	6	a
994	s	6	a
1285	s	6	a
1895	s	6	a
2242	s	6	a
1966	s	6	a
1087	s	7	a
908	s	7	a
1562	s	7	a
909	s	7	a
1378	s	7	a
1920	s	7	a
720	s	7	a
1714	s	7	a
1541	s	7	a
1757	s	7	a
1896	s	7	a
1755	s	7	a
1162	s	7	a
1915	s	7	a
1431	s	7	a
2053	s	7	a
2295	s	7	a
1076	s	7	a
1435	s	7	a
1089	s	7	a
1514	s	7	a
1932	s	8	a
1114	s	8	a
1131	s	8	a
1076	s	8	a
1421	s	8	a
952	s	8	a
1396	s	8	a
948	s	8	a
1372	s	8	a
975	s	8	a
1699	s	8	a
2061	s	8	a
2047	s	8	a
2212	s	8	a
2000	s	8	a
1086	s	8	a
1337	s	8	a
1966	s	8	a
2131	s	8	a
1851	s	8	a
1212	s	8	a
1020	s	9	a
1666	s	9	a
1938	s	9	a
1218	s	9	a
1190	s	9	a
1015	s	9	a
1655	s	9	a
1153	s	9	a
1864	s	9	a
1381	s	9	a
934	s	9	a
1327	s	9	a
1451	s	9	a
1000	s	9	a
1475	s	9	a
968	s	9	a
1693	s	9	a
1415	s	9	a
990	s	9	a
2462	s	9	a
1785	s	9	a
2137	s	10	a
2292	s	10	a
947	s	10	a
1515	s	10	a
2229	s	10	a
1264	s	10	a
1864	s	10	a
2235	s	10	a
1288	s	10	a
788	s	10	a
1512	s	10	a
755	s	10	a
795	s	10	a
1632	s	10	a
695	s	10	a
1687	s	10	a
1824	s	10	a
955	s	10	a
632	s	10	a
1258	s	10	a
1838	s	10	a
978	w	11	a
1034	w	11	a
921	w	11	a
1368	w	11	a
1371	w	11	a
1395	w	11	a
1384	w	11	a
1387	w	11	a
1371	w	11	a
1371	w	11	a
1342	w	11	a
1634	w	11	a
2112	w	11	a
900	w	11	a
905	w	11	a
1319	w	11	a
810	w	11	a
753	w	11	a
787	w	11	a
758	w	11	a
986	w	12	a
1358	w	12	a
1147	w	12	a
942	w	12	a
228	w	12	a
901	w	12	a
2268	w	12	a
1095	w	12	a
2137	w	12	a
1079	w	12	a
2269	w	12	a
908	w	12	a
759	w	12	a
901	w	12	a
1140	w	12	a
996	w	12	a
1453	w	12	a
2247	w	12	a
739	w	12	a
782	w	12	a
789	w	12	a
2214	Pa	12	p
2259	Pa	12	p
1893	Pa	12	p
1984	Pa	12	p
2313	Pa	12	p
1897	Pa	12	p
2140	Pa	12	p
2160	Pa	12	p
2177	Pa	12	p
1947	Pa	12	p
2299	Pa	12	p
1779	Pa	12	p
2126	Pa	12	p
2191	Pa	12	p
1988	Pa	12	p
402	Pb	12	p
346	Pb	12	p
805	Pb	12	p
1122	Pb	12	p
1161	Pb	12	p
1205	Pb	12	p
631	Pb	12	p
1303	Pb	12	p
1257	Pb	12	p
1225	Pb	12	p
1540	Pb	12	p
1155	Pb	12	p
680	Pb	12	p
1697	Pb	12	p
2565	Pc	12	p
2284	Pc	12	p
2546	Pc	12	p
2262	Pc	12	p
2240	Pc	12	p
2628	Pc	12	p
1990	Pc	12	p
2281	Pc	12	p
1988	Pc	12	p
2344	Pc	12	p
1950	Pc	12	p
2292	Pc	12	p
2187	Pc	12	p
1600	Pc	12	p
2359	Pc	12	p
1308	Pc	12	p
1844	Pc	12	p
1744	Pc	12	p
1778	Pc	12	p
1824	Pc	12	p
1632	Pc	12	p
1768	Pc	12	p
2120	Pc	12	p
2028	Pc	12	p
1739	Pc	12	p
1769	Pc	12	p
1454	Pc	12	p
1861	Pc	12	p
1659	Pc	12	p
1302	w	13	a
1392	w	13	a
1688	w	13	a
1618	w	13	a
885	w	13	a
743	w	13	a
1098	w	13	a
1036	w	13	a
1610	w	13	a
991	w	13	a
1497	w	13	a
1004	w	13	a
1604	w	13	a
1052	w	13	a
1510	w	13	a
864	w	13	a
890	w	13	a
1438	w	13	a
925	w	13	a
780	w	13	a
2233	Pa	13	p
2223	Pa	13	p
2034	Pa	13	p
1774	Pa	13	p
1737	Pa	13	p
1649	Pa	13	p
2049	Pa	13	p
2035	Pa	13	p
2497	Pa	13	p
1765	Pa	13	p
2370	Pa	13	p
1669	Pa	13	p
1879	Pa	13	p
2067	Pa	13	p
1955	Pa	13	p
534	Pb	13	p
652	Pb	13	p
573	Pb	13	p
1218	Pb	13	p
1242	Pb	13	p
1025	Pb	13	p
810	Pb	13	p
1199	Pb	13	p
1297	Pb	13	p
1149	Pb	13	p
1498	Pb	13	p
1133	Pb	13	p
656	Pb	13	p
1138	Pb	13	p
2088	Pc	13	p
2437	Pc	13	p
2313	Pc	13	p
2146	Pc	13	p
1949	Pc	13	p
2572	Pc	13	p
2527	Pc	13	p
2113	Pc	13	p
2004	Pc	13	p
1916	Pc	13	p
2371	Pc	13	p
1725	Pc	13	p
2238	Pc	13	p
2455	Pc	13	p
1803	Pc	13	p
2339	Pc	13	p
435	Pc	13	p
1798	Pc	13	p
1842	Pc	13	p
1741	Pc	13	p
1669	Pc	13	p
1686	Pc	13	p
1937	Pc	13	p
2187	Pc	13	p
1630	Pc	13	p
1788	Pc	13	p
1565	Pc	13	p
902	w	14	a
2210	w	14	a
753	w	14	a
1362	w	14	a
791	w	14	a
1127	w	14	a
900	w	14	a
1399	w	14	a
971	w	14	a
1017	w	14	a
1055	w	14	a
1125	w	14	a
1035	w	14	a
1135	w	14	a
1001	w	14	a
1095	w	14	a
1114	w	14	a
1341	w	14	a
1335	w	14	a
2461	w	14	a
902	w	14	a
2277	Pa	14	p
1940	Pa	14	p
1951	Pa	14	p
1838	Pa	14	p
1582	Pa	14	p
1862	Pa	14	p
2445	Pa	14	p
2317	Pa	14	p
2145	Pa	14	p
2078	Pa	14	p
2255	Pa	14	p
1669	Pa	14	p
1974	Pa	14	p
2496	Pa	14	p
1730	Pa	14	p
718	Pb	14	p
397	Pb	14	p
660	Pb	14	p
1133	Pb	14	p
946	Pb	14	p
421	Pb	14	p
917	Pb	14	p
952	Pb	14	p
1461	Pb	14	p
369	Pb	14	p
1439	Pb	14	p
940	Pb	14	p
433	Pb	14	p
1765	Pb	14	p
2296	Pc	14	p
2329	Pc	14	p
2360	Pc	14	p
2221	Pc	14	p
1988	Pc	14	p
2295	Pc	14	p
1980	Pc	14	p
2058	Pc	14	p
2010	Pc	14	p
1861	Pc	14	p
2160	Pc	14	p
2175	Pc	14	p
2282	Pc	14	p
2379	Pc	14	p
1798	Pc	14	p
1759	Pc	14	p
1783	Pc	14	p
1766	Pc	14	p
216	Pc	14	p
1529	Pc	14	p
1881	Pc	14	p
1955	Pc	14	p
1895	Pc	14	p
1734	Pc	14	p
2186	Pc	14	p
1967	Pc	14	p
1728	Pc	14	p
1369	w	15	a
1394	w	15	a
1681	w	15	a
1592	w	15	a
1379	w	15	a
934	w	15	a
1422	w	15	a
908	w	15	a
1332	w	15	a
900	w	15	a
1088	w	15	a
1079	w	15	a
1343	w	15	a
1074	w	15	a
1251	w	15	a
1056	w	15	a
1252	w	15	a
1170	w	15	a
748	w	15	a
732	w	15	a
1390	w	15	a
2215	Pa	15	p
681	Pa	15	p
1962	Pa	15	p
1951	Pa	15	p
1784	Pa	15	p
1722	Pa	15	p
2217	Pa	15	p
2255	Pa	15	p
2143	Pa	15	p
2045	Pa	15	p
2109	Pa	15	p
1633	Pa	15	p
2110	Pa	15	p
2064	Pa	15	p
1680	Pa	15	p
454	Pb	15	p
393	Pb	15	p
884	Pb	15	p
1116	Pb	15	p
579	Pb	15	p
844	Pb	15	p
1055	Pb	15	p
1236	Pb	15	p
1089	Pb	15	p
1558	Pb	15	p
1474	Pb	15	p
725	Pb	15	p
466	Pb	15	p
1085	Pc	15	p
1242	Pc	15	p
2366	Pc	15	p
2157	Pc	15	p
1788	Pc	15	p
1816	Pc	15	p
2295	Pc	15	p
2572	Pc	15	p
2205	Pc	15	p
1962	Pc	15	p
1803	Pc	15	p
2123	Pc	15	p
2222	Pc	15	p
2284	Pc	15	p
2111	Pc	15	p
1714	Pc	15	p
1599	Pc	15	p
1569	Pc	15	p
1928	Pc	15	p
2058	Pc	15	p
1772	Pc	15	p
1888	Pc	15	p
1872	Pc	15	p
1745	Pc	15	p
1668	Pc	15	p
1633	Pc	15	p
1790	Pc	15	p
1698	Pc	15	p
2314	Pa	16	p
1905	Pa	16	p
2139	Pa	16	p
1811	Pa	16	p
2278	Pa	16	p
1771	Pa	16	p
2212	Pa	16	p
2320	Pa	16	p
2245	Pa	16	p
2507	Pa	16	p
2156	Pa	16	p
1595	Pa	16	p
2048	Pa	16	p
1762	Pa	16	p
1914	Pa	16	p
389	Pb	16	p
436	Pb	16	p
1099	Pb	16	p
931	Pb	16	p
1246	Pb	16	p
380	Pb	16	p
937	Pb	16	p
1296	Pb	16	p
1232	Pb	16	p
1608	Pb	16	p
1155	Pb	16	p
1488	Pb	16	p
1191	Pb	16	p
1347	Pc	16	p
2123	Pc	16	p
2142	Pc	16	p
2382	Pc	16	p
2314	Pc	16	p
1935	Pc	16	p
2254	Pc	16	p
1861	Pc	16	p
1885	Pc	16	p
2006	Pc	16	p
1871	Pc	16	p
1950	Pc	16	p
1126	Pc	16	p
1390	Pc	16	p
2343	Pc	16	p
2186	Pc	16	p
2287	Pc	16	p
1909	Pc	16	p
2225	Pc	16	p
2057	Pc	16	p
1319	Pc	16	p
1680	Pc	16	p
2246	Pc	16	p
2216	Pc	16	p
2183	Pc	16	p
2233	Pa	17	p
1884	Pa	17	p
2046	Pa	17	p
1799	Pa	17	p
1984	Pa	17	p
1767	Pa	17	p
2260	Pa	17	p
1521	Pa	17	p
1957	Pa	17	p
2543	Pa	17	p
2520	Pa	17	p
1637	Pa	17	p
2184	Pa	17	p
1867	Pa	17	p
1961	Pa	17	p
472	Pb	17	p
658	Pb	17	p
1371	Pb	17	p
1281	Pb	17	p
943	Pb	17	p
835	Pb	17	p
975	Pb	17	p
1184	Pb	17	p
1430	Pb	17	p
1287	Pb	17	p
1165	Pb	17	p
1106	Pb	17	p
961	Pb	17	p
1278	Pc	17	p
1954	Pc	17	p
2400	Pc	17	p
1766	Pc	17	p
1984	Pc	17	p
2112	Pc	17	p
2336	Pc	17	p
2206	Pc	17	p
2116	Pc	17	p
1963	Pc	17	p
1889	Pc	17	p
2035	Pc	17	p
1108	Pc	17	p
2189	Pc	17	p
2388	Pc	17	p
2155	Pc	17	p
1048	Pc	17	p
2192	Pc	17	p
2307	Pc	17	p
2315	Pc	17	p
2189	Pc	17	p
2212	Pc	17	p
2139	Pc	17	p
1875	Pc	17	p
2242	Pc	17	p
2314	Pa	18	p
2256	Pa	18	p
2030	Pa	18	p
1915	Pa	18	p
1906	Pa	18	p
2446	Pa	18	p
2254	Pa	18	p
1764	Pa	18	p
2028	Pa	18	p
1598	Pa	18	p
2347	Pa	18	p
1536	Pa	18	p
1825	Pa	18	p
1940	Pa	18	p
256	Pb	18	p
530	Pb	18	p
768	Pb	18	p
1035	Pb	18	p
1079	Pb	18	p
1332	Pb	18	p
1290	Pb	18	p
779	Pb	18	p
403	Pb	18	p
1359	Pb	18	p
1204	Pb	18	p
1162	Pb	18	p
688	Pb	18	p
1083	Pb	18	p
2194	Pc	18	p
2406	Pc	18	p
2519	Pc	18	p
1970	Pc	18	p
2482	Pc	18	p
2072	Pc	18	p
2369	Pc	18	p
2037	Pc	18	p
2112	Pc	18	p
2369	Pc	18	p
2208	Pc	18	p
2051	Pc	18	p
1765	Pc	18	p
2152	Pc	18	p
1994	Pc	18	p
2433	Pc	18	p
2164	Pc	18	p
2142	Pc	18	p
2260	Pc	18	p
2090	Pc	18	p
1831	Pc	18	p
2336	Pc	18	p
2144	Pc	18	p
2333	Pc	18	p
2198	Pc	18	p
2238	Pa	19	p
2154	Pa	19	p
2209	Pa	19	p
2115	Pa	19	p
1810	Pa	19	p
2109	Pa	19	p
2146	Pa	19	p
1851	Pa	19	p
2095	Pa	19	p
2397	Pa	19	p
2271	Pa	19	p
2067	Pa	19	p
2222	Pa	19	p
1801	Pa	19	p
253	Pb	19	p
809	Pb	19	p
723	Pb	19	p
1006	Pb	19	p
447	Pb	19	p
892	Pb	19	p
1075	Pb	19	p
1084	Pb	19	p
454	Pb	19	p
869	Pb	19	p
1336	Pb	19	p
1465	Pb	19	p
742	Pb	19	p
637	Pb	19	p
2075	Pc	19	p
2163	Pc	19	p
2425	Pc	19	p
2374	Pc	19	p
2308	Pc	19	p
2060	Pc	19	p
2286	Pc	19	p
2311	Pc	19	p
2053	Pc	19	p
1942	Pc	19	p
1255	Pc	19	p
2244	Pc	19	p
2195	Pc	19	p
2071	Pc	19	p
2100	Pc	19	p
2239	Pc	19	p
1957	Pc	19	p
1111	Pc	19	p
2053	Pc	19	p
2019	Pc	19	p
2212	Pa	20	p
2257	Pa	20	p
2549	Pa	20	p
2364	Pa	20	p
1671	Pa	20	p
2291	Pa	20	p
1689	Pa	20	p
2313	Pa	20	p
1954	Pa	20	p
1974	Pa	20	p
1774	Pa	20	p
2056	Pa	20	p
2073	Pa	20	p
2023	Pa	20	p
428	Pb	20	p
363	Pb	20	p
699	Pb	20	p
902	Pb	20	p
362	Pb	20	p
1093	Pb	20	p
492	Pb	20	p
1159	Pb	20	p
411	Pb	20	p
1261	Pb	20	p
1588	Pb	20	p
1461	Pb	20	p
941	Pb	20	p
1715	Pb	20	p
1024	Pc	20	p
2207	Pc	20	p
2198	Pc	20	p
2136	Pc	20	p
1713	Pc	20	p
1953	Pc	20	p
2034	Pc	20	p
2146	Pc	20	p
2058	Pc	20	p
1523	Pc	20	p
2051	Pc	20	p
1863	Pc	20	p
2256	Pc	20	p
2147	Pc	20	p
1978	Pc	20	p
2110	Pc	20	p
2244	Pc	20	p
2281	Pc	20	p
2047	Pc	20	p
1953	Pc	20	p
2267	Pc	20	p

## Sheet: Univariate (dB)
dB	Type	Individual	Ant/Paussus
34.7	w	11	a
26.2	w	11	a
32.3	w	11	a
30.2	w	11	a
27	w	11	a
32.3	w	11	a
34.1	w	11	a
30.2	w	11	a
35.6	w	11	a
30.4	w	11	a
37	w	11	a
30.6	w	11	a
33.5	w	11	a
31.4	w	11	a
26.9	w	11	a
36.6	w	11	a
34	w	11	a
35.3	w	11	a
36	w	11	a
36.6	w	11	a
30.4	w	12	a
25.8	w	12	a
30.7	w	12	a
40.3	w	12	a
32.7	w	12	a
45.8	w	12	a
34.4	w	12	a
45.7	w	12	a
33.3	w	12	a
41.6	w	12	a
33.8	w	12	a
34.8	w	12	a
34.1	w	12	a
31.7	w	12	a
32.4	w	12	a
31	w	12	a
30.4	w	12	a
36.7	w	12	a
36.4	w	12	a
32.7	w	12	a
36.4	w	12	a
26.7	w	13	a
28.4	w	13	a
39.7	w	13	a
30.1	w	13	a
31.8	w	13	a
32.7	w	13	a
31.4	w	13	a
32.5	w	13	a
29.2	w	13	a
26.2	w	13	a
25.2	w	13	a
32.2	w	13	a
33.1	w	13	a
32.7	w	13	a
28.7	w	13	a
33.9	w	13	a
32.4	w	13	a
27.5	w	13	a
33.2	w	13	a
37	w	13	a
43.5	w	14	a
40.8	w	14	a
32.1	w	14	a
24.5	w	14	a
37.1	w	14	a
30.7	w	14	a
31	w	14	a
26.8	w	14	a
38.3	w	14	a
31.5	w	14	a
31.5	w	14	a
32.7	w	14	a
30.6	w	14	a
31.8	w	14	a
35.4	w	14	a
33.6	w	14	a
31.7	w	14	a
32.8	w	14	a
33.2	w	14	a
37.4	w	14	a
39.6	w	14	a
25	w	15	a
29.5	w	15	a
34.1	w	15	a
27.2	w	15	a
28.2	w	15	a
28.5	w	15	a
25.4	w	15	a
28.7	w	15	a
33.7	w	15	a
40.1	w	15	a
31.2	w	15	a
37.1	w	15	a
29.5	w	15	a
36.4	w	15	a
34	w	15	a
37.8	w	15	a
32	w	15	a
35.2	w	15	a
39.9	w	15	a
39.7	w	15	a
35.3	w	15	a
25.3	s	6	a
17	s	6	a
25.1	s	6	a
17.3	s	6	a
18.7	s	6	a
15.5	s	6	a
15.5	s	6	a
18.9	s	6	a
17	s	6	a
19.2	s	6	a
15.1	s	6	a
14.1	s	6	a
20	s	6	a
17.5	s	6	a
16.9	s	6	a
22.2	s	6	a
18.3	s	6	a
23.3	s	6	a
14.9	s	6	a
19.4	s	6	a
16	s	6	a
19	s	6	a
16.4	s	6	a
21.7	s	7	a
17.2	s	7	a
25.5	s	7	a
11.8	s	7	a
16.9	s	7	a
20.8	s	7	a
27.5	s	7	a
18.9	s	7	a
18.5	s	7	a
15.9	s	7	a
26.1	s	7	a
17.1	s	7	a
25.6	s	7	a
17.3	s	7	a
23.4	s	7	a
21.4	s	7	a
21.5	s	7	a
24.5	s	7	a
16.1	s	7	a
17.4	s	7	a
23.7	s	7	a
18.1	s	8	a
18.9	s	8	a
16.2	s	8	a
15.9	s	8	a
18	s	8	a
16.5	s	8	a
21.3	s	8	a
15.3	s	8	a
21.5	s	8	a
24.9	s	8	a
18.7	s	8	a
21.5	s	8	a
29.3	s	8	a
17.6	s	8	a
25.4	s	8	a
15.1	s	8	a
20.9	s	8	a
20.5	s	8	a
22.9	s	8	a
15.7	s	8	a
14	s	8	a
14.1	s	9	a
18.4	s	9	a
16.2	s	9	a
22.1	s	9	a
26.7	s	9	a
14.8	s	9	a
19.2	s	9	a
23.9	s	9	a
16.6	s	9	a
24.7	s	9	a
15.6	s	9	a
18.9	s	9	a
20.5	s	9	a
17.2	s	9	a
19.1	s	9	a
15.4	s	9	a
20.3	s	9	a
19.4	s	9	a
21.6	s	9	a
21.1	s	9	a
19	s	9	a
18.3	s	10	a
22.6	s	10	a
18.3	s	10	a
19.9	s	10	a
21.1	s	10	a
25.9	s	10	a
14.7	s	10	a
22.6	s	10	a
14.3	s	10	a
24.9	s	10	a
19.9	s	10	a
28	s	10	a
13.9	s	10	a
21.4	s	10	a
28.1	s	10	a
15.6	s	10	a
17.1	s	10	a
17.8	s	10	a
27.2	s	10	a
22.9	s	10	a
14.9	s	10	a
19.9	q	1	a
7.4	q	1	a
10	q	1	a
10.8	q	1	a
11.3	q	1	a
13.8	q	1	a
13.4	q	1	a
15.9	q	1	a
6.9	q	1	a
22.9	q	1	a
7.5	q	1	a
12	q	1	a
5.6	q	1	a
33.6	q	1	a
7.2	q	2	a
7.3	q	2	a
12.2	q	2	a
10.6	q	2	a
30.5	q	2	a
8.8	q	2	a
18.6	q	2	a
12.5	q	2	a
22	q	2	a
9.1	q	2	a
18.9	q	2	a
15.5	q	2	a
9.8	q	2	a
8.8	q	3	a
24.3	q	3	a
16.8	q	3	a
23.4	q	3	a
17.1	q	3	a
11.6	q	3	a
9.6	q	3	a
22	q	3	a
14	q	3	a
20.1	q	3	a
9.8	q	3	a
29.6	q	3	a
21.9	q	3	a
21	q	3	a
18.6	q	3	a
34.1	q	4	a
8.2	q	4	a
23.7	q	4	a
23.7	q	4	a
24.8	q	4	a
6.7	q	4	a
8.8	q	4	a
11.9	q	4	a
8	q	4	a
6.7	q	4	a
26.6	q	4	a
5.9	q	4	a
8.9	q	4	a
34.2	q	5	a
8.8	q	5	a
11	q	5	a
14.9	q	5	a
11.9	q	5	a
12.7	q	5	a
15.3	q	5	a
8.8	q	5	a
7.9	q	5	a
13.4	q	5	a
13.7	q	5	a
17.1	Pc	12	p
20.2	Pc	12	p
22	Pc	12	p
16	Pc	12	p
23	Pc	12	p
13.1	Pc	12	p
12.8	Pc	12	p
17.9	Pc	12	p
12.1	Pc	12	p
20.6	Pc	12	p
13.5	Pc	12	p
16.7	Pc	12	p
10.4	Pc	12	p
13.8	Pc	12	p
14.5	Pc	12	p
13.7	Pc	12	p
15.1	Pc	12	p
15.7	Pc	12	p
13.6	Pc	12	p
10.6	Pc	12	p
18.2	Pc	12	p
13	Pc	12	p
11.3	Pc	12	p
14.4	Pc	12	p
17.3	Pc	12	p
11.1	Pc	12	p
26.6	Pc	12	p
14.8	Pc	12	p
16.7	Pc	12	p
24.8	Pc	13	p
24.5	Pc	13	p
18.4	Pc	13	p
19.5	Pc	13	p
12.2	Pc	13	p
17.9	Pc	13	p
13.9	Pc	13	p
13.7	Pc	13	p
14.6	Pc	13	p
11.8	Pc	13	p
14.7	Pc	13	p
17.2	Pc	13	p
12.2	Pc	13	p
10.4	Pc	13	p
16.1	Pc	13	p
10.9	Pc	13	p
19.3	Pc	13	p
17.5	Pc	13	p
28.3	Pc	13	p
16.5	Pc	13	p
11.4	Pc	13	p
17.4	Pc	13	p
12.3	Pc	13	p
17.8	Pc	13	p
14.1	Pc	13	p
19.4	Pc	13	p
13.1	Pc	13	p
12.9	Pc	14	p
17.9	Pc	14	p
17.9	Pc	14	p
21.2	Pc	14	p
13.6	Pc	14	p
15.5	Pc	14	p
12.8	Pc	14	p
11.3	Pc	14	p
16.6	Pc	14	p
11.8	Pc	14	p
12.8	Pc	14	p
9.4	Pc	14	p
14.7	Pc	14	p
12.6	Pc	14	p
13.6	Pc	14	p
16.2	Pc	14	p
16.5	Pc	14	p
20.6	Pc	14	p
16.7	Pc	14	p
13.8	Pc	14	p
12.9	Pc	14	p
19.2	Pc	14	p
19.6	Pc	14	p
17.4	Pc	14	p
19.7	Pc	14	p
11.4	Pc	14	p
18.5	Pc	14	p
19.2	Pc	15	p
16.2	Pc	15	p
23.7	Pc	15	p
18.2	Pc	15	p
22.8	Pc	15	p
13.4	Pc	15	p
16	Pc	15	p
16.5	Pc	15	p
10.9	Pc	15	p
19	Pc	15	p
14.9	Pc	15	p
12.1	Pc	15	p
13.8	Pc	15	p
12	Pc	15	p
12	Pc	15	p
13.8	Pc	15	p
14.4	Pc	15	p
17.5	Pc	15	p
12.2	Pc	15	p
9.9	Pc	15	p
21.7	Pc	15	p
19	Pc	15	p
11.9	Pc	15	p
18.1	Pc	15	p
18.4	Pc	15	p
14.5	Pc	15	p
19	Pc	15	p
15.3	Pc	15	p
14.7	Pc	16	p
22.7	Pc	16	p
22.8	Pc	16	p
18.8	Pc	16	p
16.9	Pc	16	p
12.5	Pc	16	p
19.8	Pc	16	p
16.1	Pc	16	p
10.4	Pc	16	p
11.6	Pc	16	p
22.9	Pc	16	p
10.6	Pc	16	p
19.7	Pc	16	p
21	Pc	16	p
14.6	Pc	16	p
18.7	Pc	16	p
11.6	Pc	16	p
9.7	Pc	16	p
21.9	Pc	16	p
20.3	Pc	16	p
10.6	Pc	16	p
14.5	Pc	16	p
21.4	Pc	16	p
14.7	Pc	16	p
15.8	Pc	16	p
10.5	Pc	17	p
15.7	Pc	17	p
23.8	Pc	17	p
16.3	Pc	17	p
19.6	Pc	17	p
12.4	Pc	17	p
16.7	Pc	17	p
17.9	Pc	17	p
11.4	Pc	17	p
14.3	Pc	17	p
20.8	Pc	17	p
9.2	Pc	17	p
13.5	Pc	17	p
13.1	Pc	17	p
19.6	Pc	17	p
23.2	Pc	17	p
14	Pc	17	p
11.2	Pc	17	p
25.6	Pc	17	p
13	Pc	17	p
21.8	Pc	17	p
21.8	Pc	17	p
19.8	Pc	17	p
13.3	Pc	17	p
16.1	Pc	17	p
14.4	Pc	18	p
22.1	Pc	18	p
18.7	Pc	18	p
15.2	Pc	18	p
16.4	Pc	18	p
14	Pc	18	p
13.8	Pc	18	p
19.3	Pc	18	p
12.2	Pc	18	p
16.1	Pc	18	p
26.5	Pc	18	p
15.8	Pc	18	p
17.9	Pc	18	p
13	Pc	18	p
11.6	Pc	18	p
17.1	Pc	18	p
13.8	Pc	18	p
10.9	Pc	18	p
19.4	Pc	18	p
14.2	Pc	18	p
15.7	Pc	18	p
23.4	Pc	18	p
16.8	Pc	18	p
17.9	Pc	18	p
14.7	Pc	18	p
15.4	Pc	19	p
21.9	Pc	19	p
16.3	Pc	19	p
17.9	Pc	19	p
21	Pc	19	p
15	Pc	19	p
17.3	Pc	19	p
20.9	Pc	19	p
13.4	Pc	19	p
11.6	Pc	19	p
13.1	Pc	19	p
12.4	Pc	19	p
19.2	Pc	19	p
15.3	Pc	19	p
21.6	Pc	19	p
17.1	Pc	19	p
21.4	Pc	19	p
12.5	Pc	19	p
12.9	Pc	19	p
13.3	Pc	19	p
19	Pc	20	p
29.9	Pc	20	p
14.6	Pc	20	p
21.1	Pc	20	p
18.4	Pc	20	p
13.7	Pc	20	p
21.7	Pc	20	p
13.3	Pc	20	p
12.5	Pc	20	p
13.4	Pc	20	p
23.8	Pc	20	p
15.5	Pc	20	p
20.2	Pc	20	p
21.2	Pc	20	p
12.3	Pc	20	p
18.7	Pc	20	p
16.2	Pc	20	p
16.6	Pc	20	p
21.1	Pc	20	p
15.7	Pc	20	p
16.4	Pc	20	p
29.6	Pb	12	p
32.6	Pb	12	p
42.9	Pb	12	p
37.9	Pb	12	p
39.5	Pb	12	p
33.8	Pb	12	p
34	Pb	12	p
31.1	Pb	12	p
40.1	Pb	12	p
35.6	Pb	12	p
40.5	Pb	12	p
45.4	Pb	12	p
50.5	Pb	12	p
42.3	Pb	12	p
28.3	Pb	13	p
34.8	Pb	13	p
40.8	Pb	13	p
31	Pb	13	p
38.4	Pb	13	p
36.2	Pb	13	p
38.5	Pb	13	p
30.4	Pb	13	p
38.2	Pb	13	p
39.5	Pb	13	p
39.5	Pb	13	p
40.9	Pb	13	p
40.5	Pb	13	p
44.4	Pb	13	p
32.7	Pb	14	p
29.6	Pb	14	p
48.1	Pb	14	p
36.6	Pb	14	p
38	Pb	14	p
45.5	Pb	14	p
27.3	Pb	14	p
39.5	Pb	14	p
33	Pb	14	p
57.5	Pb	14	p
41.6	Pb	14	p
38.5	Pb	14	p
43.7	Pb	14	p
44.3	Pb	14	p
27.2	Pb	15	p
38.5	Pb	15	p
41.3	Pb	15	p
40.9	Pb	15	p
51	Pb	15	p
49.8	Pb	15	p
32.9	Pb	15	p
33.1	Pb	15	p
36.9	Pb	15	p
42.8	Pb	15	p
41.6	Pb	15	p
40.6	Pb	15	p
44.1	Pb	15	p
23.1	Pb	16	p
38.8	Pb	16	p
47.8	Pb	16	p
35.2	Pb	16	p
40.2	Pb	16	p
48.8	Pb	16	p
34.2	Pb	16	p
33.1	Pb	16	p
35.9	Pb	16	p
39.9	Pb	16	p
47.8	Pb	16	p
38.1	Pb	16	p
34.9	Pb	16	p
24.9	Pb	17	p
43.8	Pb	17	p
39.4	Pb	17	p
41.8	Pb	17	p
38.9	Pb	17	p
40.9	Pb	17	p
38.3	Pb	17	p
29.9	Pb	17	p
40.4	Pb	17	p
33	Pb	17	p
45.8	Pb	17	p
34.5	Pb	17	p
38.9	Pb	17	p
29.4	Pb	18	p
21	Pb	18	p
35.6	Pb	18	p
31	Pb	18	p
38.6	Pb	18	p
38.8	Pb	18	p
52.3	Pb	18	p
38.7	Pb	18	p
39.7	Pb	18	p
41	Pb	18	p
34.2	Pb	18	p
42.1	Pb	18	p
48.1	Pb	18	p
41.3	Pb	18	p
33.6	Pb	19	p
38.4	Pb	19	p
39.8	Pb	19	p
37.7	Pb	19	p
42.6	Pb	19	p
48.7	Pb	19	p
43.2	Pb	19	p
34.8	Pb	19	p
40.4	Pb	19	p
52.2	Pb	19	p
40.2	Pb	19	p
46	Pb	19	p
43.6	Pb	19	p
37.4	Pb	19	p
30	Pb	20	p
36.3	Pb	20	p
37.2	Pb	20	p
35.2	Pb	20	p
43.1	Pb	20	p
43.7	Pb	20	p
34.4	Pb	20	p
31	Pb	20	p
47.9	Pb	20	p
32.6	Pb	20	p
38.1	Pb	20	p
47.3	Pb	20	p
40.7	Pb	20	p
38.8	Pb	20	p
29.4	Pa	12	p
36.7	Pa	12	p
51.1	Pa	12	p
45.7	Pa	12	p
46.7	Pa	12	p
40.7	Pa	12	p
48.8	Pa	12	p
45.7	Pa	12	p
46.7	Pa	12	p
45.2	Pa	12	p
33.9	Pa	12	p
41.7	Pa	12	p
43.2	Pa	12	p
35.9	Pa	12	p
39.7	Pa	12	p
30.5	Pa	13	p
46.6	Pa	13	p
46.4	Pa	13	p
44.5	Pa	13	p
48.9	Pa	13	p
42.4	Pa	13	p
48	Pa	13	p
44.5	Pa	13	p
60.9	Pa	13	p
39.7	Pa	13	p
38.1	Pa	13	p
42	Pa	13	p
34.4	Pa	13	p
35.5	Pa	13	p
40.5	Pa	13	p
29.2	Pa	14	p
30.7	Pa	14	p
47.5	Pa	14	p
48.5	Pa	14	p
46.7	Pa	14	p
43.4	Pa	14	p
47.7	Pa	14	p
53.1	Pa	14	p
38.7	Pa	14	p
38.3	Pa	14	p
37.9	Pa	14	p
39.6	Pa	14	p
36	Pa	14	p
42.2	Pa	14	p
34	Pa	14	p
28.3	Pa	15	p
34.6	Pa	15	p
47	Pa	15	p
53	Pa	15	p
44.2	Pa	15	p
46.9	Pa	15	p
49.3	Pa	15	p
53.3	Pa	15	p
38	Pa	15	p
45	Pa	15	p
37.6	Pa	15	p
44.9	Pa	15	p
37.2	Pa	15	p
40	Pa	15	p
45.1	Pa	15	p
29.9	Pa	16	p
32.2	Pa	16	p
50.9	Pa	16	p
61.1	Pa	16	p
46.8	Pa	16	p
41	Pa	16	p
43.7	Pa	16	p
53.2	Pa	16	p
42.8	Pa	16	p
46.6	Pa	16	p
45.2	Pa	16	p
43.3	Pa	16	p
33.5	Pa	16	p
37.4	Pa	16	p
38.1	Pa	16	p
36.3	Pa	17	p
29	Pa	17	p
46.4	Pa	17	p
45.9	Pa	17	p
40	Pa	17	p
43.5	Pa	17	p
44.1	Pa	17	p
54.9	Pa	17	p
42.8	Pa	17	p
39.8	Pa	17	p
37.7	Pa	17	p
30.7	Pa	17	p
33.6	Pa	17	p
40.3	Pa	17	p
45.1	Pa	17	p
40	Pa	18	p
35.2	Pa	18	p
39.4	Pa	18	p
48.5	Pa	18	p
40.9	Pa	18	p
51.4	Pa	18	p
46.8	Pa	18	p
59.4	Pa	18	p
35.8	Pa	18	p
41.3	Pa	18	p
31.8	Pa	18	p
34.2	Pa	18	p
36.8	Pa	18	p
39.6	Pa	18	p
34.3	Pa	19	p
33.2	Pa	19	p
49.1	Pa	19	p
47.4	Pa	19	p
39.4	Pa	19	p
48.8	Pa	19	p
40.6	Pa	19	p
52.2	Pa	19	p
35.5	Pa	19	p
41.4	Pa	19	p
35.4	Pa	19	p
40.1	Pa	19	p
35	Pa	19	p
46.9	Pa	19	p
31.2	Pa	20	p
41.4	Pa	20	p
57.5	Pa	20	p
48.4	Pa	20	p
41.6	Pa	20	p
49.6	Pa	20	p
43.4	Pa	20	p
41.4	Pa	20	p
44.7	Pa	20	p
25.1	Pa	20	p
38	Pa	20	p
44.2	Pa	20	p
35.8	Pa	20	p
46.8	Pa	20	p

## Sheet: Multivariate
PulseL	FreqL	dbL	Type
0.012837	3.36455	1.61278	Pa
0.013259	3.35005	1.54777	Pa
0.01494	3.34498	1.50786	Pa
0.017451	3.34537	1.48287	Pa
0.015779	3.34908	1.49831	Pa
0.017033	3.35755	1.48001	Pa
0.017033	3.34557	1.46687	Pa
0.01536	3.36455	1.48996	Pa
0.01494	3.34908	1.57171	Pa
0.015779	3.35353	1.55871	Pa
0.01368	3.33345	1.53403	Pa
0.01368	3.35372	1.62737	Pa
0.0141	3.35411	1.57634	Pa
0.012415	3.34714	1.67761	Pa
0.009026	3.28803	1.50106	Pa
0.017033	2.83378	1.55145	Pa
0.012837	3.28012	1.52114	Pa
0.012415	3.27531	1.47712	Pa
0.019116	3.27738	1.71684	Pa
0.019116	3.30856	1.67578	Pa
0.0187	3.29048	1.68574	Pa
0.019532	3.29292	1.68124	Pa
0.020361	3.33041	1.71517	Pa
0.016616	3.31112	1.67578	Pa
0.0103	3.30771	1.60638	Pa
0.012837	3.34439	1.69984	Pa
0.012837	3.40654	1.76716	Pa
0.011993	3.29776	1.66932	Pa
0.009876	3.2492	1.65801	Pa
0.007321	3.26458	1.6946	Pa
0.011147	3.29048	1.73239	Pa
0.021603	3.25816	1.79309	Pa
0.005609	3.25527	1.67117	Pa
0.0086	3.2824	1.6946	Pa
0.01157	3.32552	1.68484	Pa
0.01368	3.37383	1.69373	Pa
0.012415	3.36436	1.67852	Pa
0.009876	3.24005	1.6981	Pa
0.007321	3.19948	1.67852	Pa
0.01157	3.25164	1.65514	Pa
0.01157	3.35774	1.67943	Pa
0.012415	3.29776	1.61278	Pa
0.01494	3.28035	1.62221	Pa
0.01536	3.25792	1.60638	Pa
0.012415	3.22324	1.62941	Pa
0.012415	3.2783	1.62014	Pa
0.009451	3.21748	1.63749	Pa
0.012837	3.27021	1.64738	Pa
0.011147	3.23629	1.68034	Pa
0.01157	3.24846	1.62325	Pa
0.0103	3.24748	1.64836	Pa
0.011993	3.38863	1.71933	Pa
0.009876	3.32428	1.69723	Pa
0.006466	3.36022	1.70415	Pa
0.005609	3.33062	1.69723	Pa
0.007748	3.31175	1.6902	Pa
0.009876	3.38846	1.68753	Pa
0.014521	3.34596	1.70157	Pa
0.01368	3.34498	1.65031	Pa
0.013259	3.3543	1.65418	Pa
0.016616	3.35315	1.67943	Pa
0.01536	3.33183	1.61909	Pa
0.012415	3.22789	1.64738	Pa
0.010724	3.33466	1.66932	Pa
0.007748	3.30878	1.65801	Pa
0.01157	3.36511	1.7332	Pa
0.01157	3.35334	1.7348	Pa
0.01368	3.36567	1.734	Pa
0.01157	3.18242	1.74741	Pa
0.01157	3.24675	1.78104	Pa
0.019532	3.26764	1.72591	Pa
0.015779	3.36436	1.62737	Pa
0.01368	3.33806	1.67852	Pa
0.012837	3.39759	1.79169	Pa
0.01494	3.33163	1.59879	Pa
0.01368	3.33122	1.59106	Pa
0.009026	3.35141	1.64147	Pa
0.008174	3.29181	1.64147	Pa
0.01368	3.30728	1.56585	Pa
0.011147	3.32139	1.56229	Pa
0.01157	3.29115	1.65992	Pa
0.006894	3.28959	1.66464	Pa
0.006894	3.24699	1.60959	Pa
0.008174	3.31785	1.59439	Pa
0.011147	3.31091	1.66276	Pa
0.006894	3.39933	1.67761	Pa
0.009876	3.40552	1.61066	Pa
0.0086	3.20385	1.62634	Pa
0.011993	3.37985	1.62737	Pa
0.018284	3.29557	1.41664	Pa
0.01494	3.36173	1.54282	Pa
0.012837	3.37493	1.59218	Pa
0.0103	3.35334	1.58995	Pa
0.012415	3.32428	1.58659	Pa
0.011147	3.33385	1.66464	Pa
0.012415	3.40157	1.58771	Pa
0.01494	3.3707	1.51587	Pa
0.01368	3.35641	1.5611	Pa
0.009451	3.2492	1.59106	Pa
0.009026	3.25042	1.63043	Pa
0.009026	3.22272	1.63347	Pa
0.01157	3.22272	1.60853	Pa
0.0103	3.21325	1.66181	Pa
0.008174	3.20303	1.6464	Pa
0.009026	3.21431	1.50106	Pa
0.009451	3.18667	1.54654	Pa
0.013259	3.31555	1.61384	Pa
0.01536	3.31323	1.65514	Pa
0.01536	3.32777	1.64542	Pa
0.015779	3.27416	1.549	Pa
0.013259	3.29557	1.5682	Pa
0.012837	3.32449	1.58206	Pa
0.010724	3.31154	1.53782	Pa
0.011147	3.33945	1.53908	Pa
0.013259	3.2615	1.57749	Pa
0.013259	3.34694	1.5563	Pa
0.015779	3.31681	1.56585	Pa
0.013259	3.34084	1.56703	Pa
0.01157	3.31555	1.56229	Pa
0.013259	3.39742	1.63548	Pa
0.0141	3.31492	1.61278	Pa
0.0141	3.24625	1.58433	Pa
0.011993	3.27138	1.61595	Pa
0.016616	3.28803	1.60853	Pa
0.012837	3.25576	1.68034	Pa
0.016616	3.30621	1.67943	Pa
0.015779	3.29863	1.60959	Pa
0.017033	3.29137	1.61805	Pa
0.015779	3.2383	1.54407	Pa
0.015779	3.22557	1.6637	Pa
0.011993	3.28217	1.59218	Pa
0.010724	3.2927	1.6637	Pa
0.007748	2.40993	1.48287	Pb
0.005609	2.40483	1.53908	Pb
0.007748	2.63246	1.49136	Pb
0.006894	2.6053	1.48572	Pb
0.0086	2.72835	1.46687	Pb
0.005609	2.85673	1.52763	Pb
0.006894	2.65801	1.45025	Pb
0.006038	2.59106	1.38202	Pb
0.006038	2.67486	1.4133	Pb
0.006894	2.7251	1.34242	Pb
0.005609	2.90849	1.5955	Pb
0.006466	2.5611	1.57171	Pb
0.005609	2.54033	1.52634	Pb
0.006038	2.81491	1.55388	Pb
0.006466	2.59988	1.48572	Pb
0.005609	2.5955	1.5966	Pb
0.006038	2.64048	1.59988	Pb
0.007748	2.81888	1.65128	Pb
0.005181	2.88593	1.56348	Pb
0.005609	2.85974	1.61066	Pb
0.006894	2.8451	1.58206	Pb
0.005181	2.90633	1.64247	Pb
0.006038	2.75891	1.62118	Pb
0.014521	2.8202	1.69108	Pb
0.009451	2.94694	1.62634	Pb
0.006466	3.04139	1.68842	Pb
0.005181	3.13735	1.60638	Pb
0.004751	3.01536	1.50515	Pb
0.004321	3.00303	1.58771	Pb
0.005181	2.95569	1.55871	Pb
0.005181	3.05038	1.58995	Pb
0.005181	3.086	1.50515	Pb
0.005181	3.05461	1.57519	Pb
0.009026	3.04805	1.62221	Pb
0.005181	2.96942	1.55871	Pb
0.005609	3.10789	1.63144	Pb
0.006466	3.03342	1.5977	Pb
0.006038	2.65128	1.63949	Pb
0.005181	2.55991	1.64444	Pb
0.005181	3.06521	1.60746	Pb
0.005609	3.09447	1.5955	Pb
0.005181	2.97635	1.59106	Pb
0.004751	2.76343	1.716	Pb
0.005181	3.09587	1.6149	Pb
0.005609	2.97497	1.60097	Pb
0.005181	3.12483	1.59988	Pb
0.005181	2.95085	1.69636	Pb
0.005609	3.03902	1.65031	Pb
0.005181	3.08135	1.54158	Pb
0.005181	3.01115	1.57054	Pb
0.005609	2.62531	1.66745	Pb
0.005181	2.92686	1.70586	Pb
0.005181	2.58093	1.69723	Pb
0.006038	2.92221	1.62221	Pb
0.008174	3.11093	1.72673	Pb
0.007321	3.03181	1.64542	Pb
0.006466	2.69285	1.549	Pb
0.006038	2.80072	1.54407	Pb
0.005181	2.90902	1.5966	Pb
0.006038	2.96284	1.45179	Pb
0.006466	3.02366	1.5302	Pb
0.005181	2.9722	1.54654	Pb
0.005609	2.98945	1.59439	Pb
0.006466	2.89209	1.59879	Pb
0.005181	3.03543	1.55388	Pb
0.006466	3.06446	1.50515	Pb
0.006038	3.11528	1.5065	Pb
0.006038	3.07918	1.49693	Pb
0.005181	2.97909	1.60746	Pb
0.005181	3.09237	1.53275	Pb
0.006466	3.11294	1.53275	Pb
0.006894	3.07372	1.48996	Pb
0.006466	2.60638	1.60959	Pb
0.005609	2.65801	1.617	Pb
0.006466	2.6149	1.68931	Pb
0.005609	3.09968	1.61384	Pb
0.007321	3.11327	1.59329	Pb
0.006038	3.16495	1.53148	Pb
0.006038	3.03743	1.57864	Pb
0.010724	3.09096	1.56703	Pb
0.006038	3.15564	1.617	Pb
0.005609	3.13354	1.62325	Pb
0.006038	2.93952	1.72591	Pb
0.006894	3.10106	1.52634	Pb
0.010724	3.08849	1.56348	Pb
0.007748	3.0607	1.60746	Pb
0.006038	2.5682	1.76716	Pb
0.0103	3.19285	1.64147	Pb
0.005609	3.20656	1.61172	Pb
0.006466	3.10992	1.53148	Pb
0.005609	3.08099	1.54654	Pb
0.005181	3.12613	1.6149	Pb
0.005609	3.20112	1.59218	Pb
0.005181	3.1878	1.61805	Pb
0.005181	3.1758	1.60746	Pb
0.005181	3.15836	1.62941	Pb
0.005609	3.16879	1.62941	Pb
0.006466	3.06296	1.68842	Pb
0.009876	3.0667	1.67025	Pb
0.006038	3.06558	1.63448	Pb
0.009876	3.16613	1.6721	Pb
0.005609	3.16495	1.68395	Pb
0.0086	3.06296	1.66652	Pb
0.006038	3.05461	1.62221	Pb
0.006894	2.97359	1.5966	Pb
0.006038	2.86094	1.61909	Pb
0.004751	3.1729	1.59218	Pb
0.005181	3.04415	1.55023	Pb
0.005609	2.83822	1.69108	Pb
0.005181	2.87099	1.64933	Pb
0.006038	2.97405	1.62014	Pb
0.011147	2.83315	1.71181	Pb
0.005609	2.81757	1.61805	Pb
0.005181	2.63749	1.65031	Pb
0.004751	2.66932	1.65418	Pb
0.005181	3.07628	1.55509	Pb
0.005609	2.98318	1.60097	Pb
0.005181	3.03503	1.62634	Pb
0.006038	2.80482	1.58433	Pb
0.0103	3.23452	1.59988	Pb
0.0141	3.22994	1.63649	Pb
0.005609	3.05652	1.65706	Pb
0.005609	3.24699	1.6561	Pb
0.074816	3.31931	1.30535	Pc
0.052694	3.3707	1.1959	Pc
0.034227	3.35774	1.33244	Pc
0.029384	3.34144	1.18752	Pc
0.034227	3.31723	1.21484	Pc
0.080626	3.30642	1.30103	Pc
0.049993	3.40926	1.25768	Pc
0.058426	3.31994	1.41162	Pc
0.039017	3.36116	1.14301	Pc
0.070407	3.35083	1.23553	Pc
0.02735	3.32715	1.37475	Pc
0.03543	3.29115	1.22272	Pc
0.040998	3.38148	1.36361	Pc
0.03623	3.33526	1.35983	Pc
0.054613	3.344	1.48996	Pc
0.032216	3.35889	1.32634	Pc
0.026125	3.38703	1.40654	Pc
0.032216	3.36736	1.27646	Pc
0.031812	3.3742	1.3927	Pc
0.036629	3.33102	1.37658	Pc
0.029789	3.38039	1.39445	Pc
0.031004	3.4014	1.29447	Pc
0.03862	3.38489	1.23805	Pc
0.033826	3.34223	1.19312	Pc
0.029384	3.40603	1.36173	Pc
0.036629	3.36436	1.2878	Pc
0.028978	3.3731	1.27646	Pc
0.041393	3.33405	1.2833	Pc
0.035029	3.37712	1.29666	Pc
0.059563	3.24724	1.23805	Pc
0.03862	3.29469	1.20951	Pc
0.031812	3.37566	1.27646	Pc
0.03623	3.3298	1.34439	Pc
0.042576	3.35468	1.23045	Pc
0.032216	3.33183	1.31175	Pc
0.041787	3.34674	1.34635	Pc
0.048053	3.25261	1.37658	Pc
0.04454	3.36455	1.25285	Pc
0.032216	3.29776	1.31387	Pc
0.041787	3.39498	1.24055	Pc
0.049218	3.36342	1.34242	Pc
0.044148	3.23401	1.2878	Pc
0.028978	3.35044	1.38021	Pc
0.040207	3.29004	1.12057	Pc
0.044148	3.29863	1.16435	Pc
0.03623	3.25935	1.15836	Pc
0.045714	3.2869	1.13033	Pc
0.03623	3.3249	1.12711	Pc
0.053463	3.3166	1.17609	Pc
0.053078	3.31408	1.20412	Pc
0.031408	3.29093	1.16732	Pc
0.043755	3.41979	1.14922	Pc
0.037028	3.41044	1.27646	Pc
0.0306	3.36097	1.21748	Pc
0.032619	3.36097	1.23045	Pc
0.038223	3.35315	1.31806	Pc
0.032216	3.36866	1.24797	Pc
0.031408	3.37475	1.17026	Pc
0.03543	3.35927	1.26245	Pc
0.044932	3.30856	1.35603	Pc
0.043755	3.29907	1.13988	Pc
0.040207	3.40278	1.17319	Pc
0.042182	3.29688	1.13988	Pc
0.037426	3.41044	1.24304	Pc
0.032619	3.26998	1.233	Pc
0.04883	3.3438	1.27646	Pc
0.050766	3.3092	1.3075	Pc
0.03623	3.36399	1.34044	Pc
0.043362	3.33183	1.15534	Pc
0.034227	3.35832	1.27646	Pc
0.039811	3.32511	1.16732	Pc
0.033826	3.31366	1.0899	Pc
0.033826	3.34361	1.07555	Pc
0.037825	3.27554	1.0569	Pc
0.033424	3.32572	1.09342	Pc
0.039017	3.3249	1.12057	Pc
0.03543	3.3126	1.15836	Pc
0.034227	3.31366	1.13033	Pc
0.033021	3.29863	1.11727	Pc
0.037426	3.30211	1.19312	Pc
0.026533	3.30341	1.24551	Pc
0.017868	3.29292	1.30103	Pc
0.040207	3.30255	1.10037	Pc
0.031004	3.29314	1.18469	Pc
0.038223	3.37475	1.233	Pc
0.032216	3.28847	1.10037	Pc
0.041787	3.18298	1.15836	Pc
0.03862	3.37014	1.33445	Pc
0.049218	3.28262	1.10721	Pc
0.040602	3.26998	1.10721	Pc
0.051924	3.25624	1.2014	Pc
0.048053	3.27231	1.3784	Pc
0.046885	3.27646	1.33846	Pc
0.030195	3.3442	1.43933	Pc
0.038223	3.09899	1.14922	Pc
0.024486	3.31218	1.39445	Pc
0.048442	3.27045	1.21748	Pc
0.053846	3.35353	1.32634	Pc
0.036629	3.33203	1.34635	Pc
0.032619	3.29645	1.12385	Pc
0.039811	3.32449	1.29447	Pc
0.046495	3.35122	1.23553	Pc
0.046885	3.35832	1.24551	Pc
0.051538	3.31133	1.34439	Pc
0.028164	3.29093	1.22272	Pc
0.056905	3.35564	1.24055	Pc
0.046105	3.35122	1.12711	Pc
0.042576	3.34163	1.30535	Pc
0.033021	3.31639	1.21219	Pc
0.036629	3.32243	1.35411	Pc
0.048053	3.35025	1.25768	Pc
0.030195	3.29181	1.35025	Pc
0.10721	3.28149	1.37107	Pc
0.044932	3.3126	1.14301	Pc
0.044932	3.30535	1.15534	Pc
0.04883	3.31218	1.22531	Pc
0.037426	3.30878	1.0086	Pc
0.047275	3.29026	1.06446	Pc
0.044148	3.24699	1.27646	Pc
0.078457	3.23274	1.38917	Pc
0.071145	3.32777	1.31597	Pc
0.045323	3.33304	1.14613	Pc
0.052309	3.34044	1.14922	Pc
0.023664	3.14333	1.34242	Pc
0.043362	3.29994	1.10037	Pc
0.038223	3.37822	1.31387	Pc
0.045714	3.36996	1.19312	Pc
0.040602	3.38632	1.25768	Pc
0.04454	3.33365	1.38382	Pc
0.040207	3.33985	1.29447	Pc
0.042576	3.33546	1.17026	Pc
0.067815	3.31154	1.17609	Pc
0.04454	3.35946	1.10037	Pc
0.03543	3.33102	1.07555	Pc
0.037825	3.34104	1.08636	Pc
0.037028	3.28103	1.02938	Pc
0.030195	3.3543	1.30963	Pc
0.056142	3.36324	1.42488	Pc
0.03543	3.34753	1.35983	Pc
0.035029	3.32035	1.18184	Pc
0.033424	3.36474	1.14613	Pc
0.035029	3.31345	1.32838	Pc
0.046105	3.26293	1.22272	Pc
0.032619	3.34044	1.35793	Pc
0.066699	3.36549	1.33445	Pc
0.033021	3.36866	1.38739	Pc
0.042182	3.34498	1.35793	Pc
0.044932	3.22557	1.19033	Pc
0.03583	3.33143	1.25042	Pc
0.042182	3.33041	1.31806	Pc
0.033021	3.3516	1.35025	Pc
0.042576	3.3681	1.27646	Pc
0.042576	3.27323	1.15534	Pc
0.033424	3.34577	1.1959	Pc
0.03543	3.34223	1.1959	Pc
0.034628	3.35083	1.233	Pc
0.040207	3.33925	1.22531	Pc
0.050766	3.32715	1.11727	Pc
0.040998	3.33466	1.13988	Pc
0.04454	3.37512	1.1959	Pc
0.046105	3.29026	1.16137	Pc
0.031812	3.34694	1.17026	Pc
0.03623	3.33766	1.01703	Pc
0.046885	3.23704	1.26007	Pc
0.044148	3.3604	1.24797	Pc
0.042576	3.35889	1.11394	Pc
0.029384	3.35851	1.1959	Pc
0.039017	3.35005	1.12057	Pc
0.034628	3.34005	1.0569	Pc
0.03583	3.32469	1.11394	Pc
0.042182	3.37658	1.13354	Pc
0.038223	3.39023	1.0569	Pc
0.05038	3.20439	1.17026	Pc
0.040602	3.23426	1.17026	Pc
0.051153	3.25503	1.16435	Pc
0.051538	3.25624	1.233	Pc
0.044932	3.37291	1.19033	Pc
0.056524	3.20412	1.18752	Pc
0.04883	3.24551	1.23553	Pc
0.04454	3.36922	1.07555	Pc
0.091667	3.36342	1.16732	Pc
0.025306	3.1959	1.26717	Pc
0.048053	3.2514	1.24304	Pc
0.044932	2.63949	1.3075	Pc
0.037825	3.266	1.20683	Pc
0.043755	3.28533	1.12057	Pc
0.03862	3.24724	1.33445	Pc
0.049993	3.25503	1.26717	Pc
0.022428	3.2418	1.22272	Pc
0.039414	3.31366	1.03743	Pc
0.048053	2.33646	1.24797	Pc
0.031004	3.26552	1.46687	Pc
0.0306	3.25018	1.53908	Pc
0.032619	3.24871	1.35603	Pc
0.063333	3.18469	1.51587	Pc
0.079181	3.24105	1.57403	Pc
0.037825	3.26126	1.49969	Pc
0.03583	3.27623	1.47712	Pc
0.039414	3.27462	1.5302	Pc
0.039017	3.22272	1.51055	Pc
0.032216	3.21299	1.46538	Pc
0.035029	3.27254	1.5172	Pc
0.033424	3.29137	1.48001	Pc
0.045323	3.22711	1.45332	Pc
0.031812	3.24773	1.53148	Pc
0.033826	3.24204	1.46389	Pc
0.026533	3.27784	1.48572	Pc
0.038223	3.28735	1.52244	Pc
0.030195	3.32654	1.5092	Pc
0.0306	3.22246	1.46835	Pc
0.011147	3.2393	1.45332	Pc
0.01368	3.34005	1.58883	Pc
0.012837	3.30728	1.549	Pc
0.014521	3.21325	1.55023	Pc
0.014521	3.33985	1.60959	Pc
0.013259	3.21245	1.61384	Pc
0.017033	3.24055	1.5832	Pc
0.029789	3.2531	1.47712	Pc
0.0141	3.29402	1.51055	Pc
0.01368	3.25261	1.60638	Pc
0.016197	3.24797	1.62428	Pc
0.017033	3.23019	1.55991	Pc
0.011993	3.2378	1.5966	Pc
0.011993	3.19479	1.53275	Pc
0.007321	3.16286	1.44091	Pc
0.010724	3.26998	1.66087	Pc
0.009026	3.22011	1.57634	Pc
0.024075	2.99123	1.32015	q
0.021189	3.04922	1.54654	q
0.024486	3.20844	1.13672	q
0.031408	3.12872	0.924279	q
0.029789	3.15534	0.954243	q
0.030195	3.1427	0.819544	q
0.03543	3.08063	0.991226	q
0.033021	3.13988	0.886491	q
0.005609	3.09026	1.21219	q
0.029384	3.09447	1.04139	q
0.016616	3.17493	1.44091	q
0.037028	3.10106	0.995635	q
0.034227	3.11694	1.07188	q
0.032619	3.11992	0.838849	q
0.033424	3.13513	0.991226	q
0.033826	3.13033	0.913814	q
0.0103	2.99564	1.40312	q
0.025715	3.18469	0.94939	q
0.044148	3.15836	1.15836	q
0.034227	3.12385	0.919078	q
0.029789	3.13862	1.0899	q
0.023252	3.1345	1.16732	q
0.029789	3.07225	1.12057	q
0.026533	3.03141	1.17026	q
0.0306	3.08743	1.25042	q
0.034227	3.13418	1.06446	q
0.025715	3.15715	1.38739	q
0.028978	3.14582	1.15836	q
0.039414	3.10992	1.49831	q
0.028164	3.20358	1.25768	q
0.037825	3.17493	1.10037	q
0.032216	3.16761	0.991226	q
0.042182	3.01157	1.22789	q
0.028164	3.18808	0.897627	q
0.037426	3.20683	1.29226	q
0.025715	3.18356	1.02531	q
0.032216	3.15776	1.36173	q
0.029789	3.19893	1.13033	q
0.027757	3.1014	1.3784	q
0.028164	3.16791	0.929419	q
0.021603	3.13226	1.36173	q
0.027757	3.19451	1.17609	q
0.026125	3.21059	1.11394	q
0.026533	3.21405	1.00432	q
0.018284	2.97727	1.54531	q
0.026125	3.19257	0.963788	q
0.0086	3.09864	1.29885	q
0.016197	3.0799	1.53908	q
0.042969	3.18356	1.3927	q
0.025715	3.16909	1.21748	q
0.028164	3.15106	1.32428	q
0.022016	3.19424	1.3927	q
0.033021	3.21484	1.03342	q
0.034628	3.20222	1.03342	q
0.039017	3.22141	1.41162	q
0.031408	3.21617	0.991226	q
0.010724	3.19976	1.48572	q
0.028978	3.16909	0.886491	q
0.024075	3.17493	1.07918	q
0.020361	3.18837	1.35983	q
0.029384	3.11628	0.991226	q
0.022428	3.12678	1.2014	q
0.023664	3.02119	1.34242	q
0.029789	3.1827	1.11059	q
0.025715	3.1232	1.11059	q
0.023252	3.20844	1.29226	q
0.020361	3.03663	1.35603	s
0.022428	3.3126	1.35025	s
0.017033	2.89708	1.4133	s
0.027757	2.95856	1.26007	s
0.021189	3.36097	1.35218	s
0.033021	3.17984	1.32015	s
0.020775	2.87852	1.4624	s
0.031812	3.03222	1.40654	s
0.0187	3.19396	1.42325	s
0.028571	2.90091	1.17319	s
0.018284	3.15715	1.233	s
0.032216	2.95904	1.10721	s
0.023252	3.13956	1.25285	s
0.032216	3.03743	1.26482	s
0.026942	3.21299	1.35025	s
0.031812	3.28353	1.33846	s
0.023252	2.84261	1.46389	s
0.033826	3.18041	1.3927	s
0.021603	2.85793	1.45484	s
0.034628	3.00903	1.17898	s
0.024896	3.22737	1.22011	s
0.048442	3.23426	1.29885	s
0.046885	3.22194	1.2878	s
0.067815	3.26126	1.25768	s
0.058805	3.18808	1.29004	s
0.031408	3.28758	1.23553	s
0.035029	2.98046	1.27416	s
0.02735	3.24502	1.22789	s
0.037825	3.086	1.36361	s
0.026125	2.8014	1.45025	s
0.034628	3.27807	1.43297	s
0.022841	3.07591	1.44248	s
0.011147	3.10003	1.3784	s
0.033021	3.24452	1.25768	s
0.024486	3.00689	1.19866	s
0.034628	3.26458	1.2014	s
0.006038	3.06558	1.42488	s
0.02735	3.21906	1.30535	s
0.021603	3.1486	1.41996	s
0.028571	3.2824	1.26245	s
0.021189	3.06221	1.3962	s
0.0306	3.28758	1.25527	s
0.019947	3.15594	1.38739	s
0.029384	3.27068	1.24551	s
0.023664	2.85309	1.41664	s
0.029384	3.28623	1.28103	s
0.023252	3.14051	1.40993	s
0.028164	3.27944	1.26245	s
0.011993	3.04727	1.29885	s
0.020361	2.97081	1.22011	s
0.0187	3.18921	1.29447	s
0.027757	3.05385	1.23553	s
0.024486	2.96284	1.21748	s
0.020775	3.1232	1.29885	s
0.030195	3.03222	1.22789	s
0.022841	3.16197	1.33244	s
0.033424	3.02036	1.21748	s
0.024075	3.1529	1.27875	s
0.032619	3.00043	1.26007	s
0.020775	3.16435	1.29885	s
0.033826	2.97909	1.24304	s
0.022428	3.16909	1.3032	s
0.031812	2.99695	1.25527	s
0.026942	3.1452	1.34831	s
0.030195	2.98632	1.21484	s
0.026533	3.14302	1.30535	s
0.028978	2.97727	1.21219	s
0.027757	3.22891	1.32838	s
0.026942	2.9154	1.20683	s
0.022428	3.13767	1.35218	s
0.028164	2.91803	1.17898	s
0.022428	3.15106	1.30963	s
0.033826	2.98945	1.4133	s
0.028164	2.99607	1.35411	s
0.026533	3.12025	1.32222	s
0.026125	3.23045	1.29447	s
0.029789	3.39146	1.34439	s
0.026533	3.20303	1.26717	s
0.02735	3.31429	1.35218	s
0.028164	3.25188	1.30103	s
0.031004	3.29579	1.25285	s
0.024075	3.31133	1.48144	s
0.025306	3.33001	1.28556	s
0.025715	3.30878	1.36549	s
0.024896	3.34498	1.26951	s
0.025715	3.3604	1.37291	s
0.020775	3.3483	1.28556	s
0.024075	3.30125	1.4216	s
0.024075	2.97681	1.28556	s
0.026942	3.06707	1.38561	s
0.028978	3.03623	1.20683	s
0.022841	3.1807	1.32015	s
0.030195	2.99782	1.2014	s
0.026125	3.12646	1.34044	s
0.033021	3.3483	1.34439	s
0.025715	3.10924	1.30963	s
0.032619	3.2938	1.33244	s
0.023252	3.10209	1.42975	s
0.0306	3.27784	1.23045	s
0.02735	3.32879	1.3784	s
0.033021	3.27068	1.1959	s
0.028164	3.35083	1.30103	s
0.031812	3.26764	1.22272	s
0.026533	3.34947	1.37291	s
0.0306	3.2938	1.24055	s
0.00732095	3.08386	1.17609	s
0.00817418	3.11025	1.18469	s
0.021189	2.99432	1.49693	w
0.025306	3.11494	1.44248	w
0.020775	2.99078	1.55267	w
0.024896	3.01494	1.43457	w
0.023252	2.96473	1.52244	w
0.028571	3.13672	1.41497	w
0.020775	3.14457	1.4843	w
0.02735	3.13322	1.42813	w
0.021603	3.1364	1.49415	w
0.027757	3.13735	1.44716	w
0.020361	3.14488	1.52244	w
0.026125	3.14395	1.46835	w
0.022016	3.14145	1.54531	w
0.02735	3.14239	1.49415	w
0.020361	3.13735	1.56348	w
0.029384	3.13735	1.49693	w
0.019947	3.22763	1.60959	w
0.029789	3.20925	1.49276	w
0.019947	3.12808	1.57978	w
0.028571	3.21352	1.49969	w
0.024075	3.22583	1.54531	w
0.033826	3.05994	1.50106	w
0.023664	2.97451	1.61595	w
0.017868	2.95569	1.64836	w
0.026125	3.3249	1.53782	w
0.022016	2.95521	1.67025	w
0.031004	3.35583	1.549	w
0.020775	3.03981	1.66932	w
0.031812	3.33001	1.53529	w
0.021189	3.03342	1.62941	w
0.029789	3.35603	1.54158	w
0.014521	3.34459	1.62118	w
0.025306	2.95856	1.55388	w
0.020775	2.88081	1.54531	w
0.027757	2.94743	1.51587	w
0.0187	2.87737	1.51983	w
0.025306	2.95521	1.51455	w
0.0187	3.05729	1.52375	w
0.027757	2.95472	1.51055	w
0.019532	2.87157	1.52763	w
0.026125	3.041	1.51055	w
0.021603	3.01578	1.52504	w
0.027757	3.2071	1.48001	w
0.017033	2.9987	1.50515	w
0.023664	3.20222	1.45025	w
0.019947	2.99651	1.43457	w
0.024896	3.17551	1.4183	w
0.017451	3.00217	1.52114	w
0.024486	3.20547	1.53275	w
0.023664	3.02243	1.52763	w
0.032216	3.13988	1.46538	w
0.0187	2.97081	1.46982	w
0.025306	3.17926	1.47276	w
0.0187	2.93702	1.54282	w
0.023664	3.1532	1.4216	w
0.0187	2.94988	1.52375	w
0.028164	3.15806	1.45484	w
0.024486	2.95713	1.4456	w
0.0306	3.1345	1.40654	w
0.019532	2.95856	1.47276	w
0.024486	3.16256	1.49693	w
0.016197	2.89873	1.58092	w
0.024486	3.05231	1.50106	w
0.020361	2.95472	1.50515	w
0.028164	3.14613	1.44405	w
0.022841	3.12483	1.54033	w
0.014521	2.95472	1.61384	w
0.023664	3.3518	1.57634	w
0.020361	2.98767	1.59439	w
0.026942	3.00775	1.51188	w
0.022841	2.86923	1.57287	w
0.025715	3.02366	1.51188	w
0.019947	3.05154	1.52763	w
0.025715	3.01536	1.49969	w
0.024896	3.05538	1.51587	w
0.026942	3.00087	1.5611	w
0.019532	3.03981	1.53908	w
0.024075	3.04727	1.51455	w
0.017033	3.03703	1.50786	w
0.025715	3.12775	1.52892	w
0.016616	3.12057	1.57519	w
0.02735	3.12581	1.53403	w
0.020775	3.03342	1.58092	w
0.030195	3.1284	1.4843	w
0.023252	3.03141	1.57287	w
0.029789	3.0976	1.54407	w
0.019532	3.02407	1.58883	w
0.025715	3.09795	1.51851	w
0.026942	3.39129	1.58433	w
0.021189	3.06856	1.55871	w
0.027757	2.90902	1.54407	w
0.020361	2.89376	1.52763	w
0.025306	2.96661	1.53403	w
0.019532	2.87737	1.55991	w
0.028164	2.89763	1.57287	w
0.019532	2.89265	1.57978	w
0.026942	2.89653	1.5682	w
0.019532	2.88024	1.57519	w
0.026533	2.95569	1.60853	w
0.044148	2.87448	1.61172	w
0.022841	2.8651	1.60959	w
0.025715	3.14333	1.55991	w
0.022016	2.80346	1.26245	W_Myr
0.018284	2.86688	1.2014	W_Myr
0.031004	2.35983	1.52763	W_Myr
0.00860017	2.8488	1.11059	W_Myr
0.00732095	2.91698	0.929419	W_Myr
0.00689371	2.8293	1.07918	W_Myr
0.00603795	2.81023	1.08279	W_Myr
0.00646604	2.8202	1.07918	W_Myr
0.00603795	2.84011	1.08636	W_Myr
0.00732095	2.85854	1.12057	W_Myr
0.00603795	2.78247	1.12385	W_Myr
0.00817418	2.8451	0.90309	Q_Myr
0.00860017	2.82866	0.643453	Q_Myr
0.00603795	2.90091	0.755875	Q_Myr
0.00902574	2.79934	0.568202	Q_Myr
0.00560945	2.88024	0.819544	Q_Myr
0.00774778	2.79029	0.491362	Q_Myr
0.00774778	2.81558	0.70757	Q_Myr
0.00817418	2.8488	0.812913	Q_Myr
0.0157788	2.80277	0.819544	Q_Myr
0.0187005	2.78817	0.986772	Q_Myr

## Sheet: Paussus M_F
Pulse	Freq	dB	M_F
0.041	2214	29.4	F
0.037	2233	30.5	F
0.04	2277	29.2	F
0.04	2215	28.3	F
0.033	2259	36.7	F
0.029	2223	46.6	F
0.021	1940	30.7	F
0.04	681	34.6	F
0.045	1893	51.1	F
0.045	2034	46.4	F
0.044	1951	47.5	F
0.046	1962	47	F
0.028	1984	45.7	F
0.023	1774	44.5	F
0.017	1838	48.5	F
0.026	1951	53	F
0.029	2313	46.7	F
0.023	1737	48.9	F
0.017	1582	46.7	F
0.027	1784	44.2	F
0.029	1897	40.7	F
0.022	1649	42.4	F
0.03	1862	43.4	F
0.026	1722	46.9	F
0.013	2140	48.8	F
0.018	2049	48	F
0.023	2445	47.7	F
0.034	2217	49.3	F
0.025	2160	45.7	F
0.018	2035	44.5	F
0.027	2317	53.1	F
0.027	2255	53.3	F
0.032	2177	46.7	F
0.03	2497	60.9	F
0.035	2145	38.7	F
0.032	2143	38	F
0.016	1947	45.2	F
0.016	1765	39.7	F
0.019	2078	38.3	F
0.026	2045	45	F
0.035	2299	33.9	F
0.03	2370	38.1	F
0.024	2255	37.9	F
0.029	2109	37.6	F
0.021	1779	41.7	F
0.021	1669	42	F
0.027	1669	39.6	F
0.024	1633	44.9	F
0.036	2126	43.2	F
0.037	1879	34.4	F
0.031	1974	36	F
0.03	2110	37.2	F
0.031	2191	35.9	F
0.027	2067	35.5	F
0.031	2496	42.2	F
0.033	2064	40	F
0.037	1988	39.7	F
0.04	1955	40.5	F
0.037	1730	34	F
0.037	1680	45.1	F
0.016	402	29.6	F
0.02	534	28.3	F
0.013	718	32.7	F
0.016	454	27.2	F
0.013	346	32.6	F
0.014	652	34.8	F
0.015	397	29.6	F
0.013	393	38.5	F
0.012	805	42.9	F
0.014	573	40.8	F
0.034	660	48.1	F
0.022	884	41.3	F
0.012	1122	37.9	F
0.012	1218	31	F
0.012	1133	36.6	F
0.021	1116	40.9	F
0.012	1161	39.5	F
0.013	1242	38.4	F
0.012	946	38	F
0.011	579	51	F
0.012	1205	33.8	F
0.012	1025	36.2	F
0.013	421	45.5	F
0.012	844	49.8	F
0.014	631	34	F
0.012	810	38.5	F
0.014	917	27.3	F
0.015	1055	32.9	F
0.014	1303	31.1	F
0.014	1199	30.4	F
0.012	952	39.5	F
0.012	1236	33.1	F
0.013	1257	40.1	F
0.017	1297	38.2	F
0.014	1461	33	F
0.014	1089	36.9	F
0.025	1225	35.6	F
0.018	1149	39.5	F
0.014	369	57.5	F
0.024	1558	42.8	F
0.012	1540	40.5	F
0.012	1498	39.5	F
0.012	1439	41.6	F
0.013	1474	41.6	F
0.02	1155	45.4	F
0.014	1133	40.9	F
0.016	940	38.5	F
0.014	725	40.6	F
0.026	680	50.5	F
0.013	656	40.5	F
0.012	433	43.7	F
0.011	466	44.1	F
0.033	1697	42.3	F
0.013	1138	44.4	F
0.013	1765	44.3	F
0.188	2085	19.2	F
0.129	2347	14.7	F
0.204	2024	19	F
0.122	2565	17.1	F
0.144	2088	24.8	F
0.094	2296	12.9	F
0.176	2242	16.2	F
0.077	2284	20.2	F
0.062	2437	24.5	F
0.077	2329	17.9	F
0.076	2366	23.7	F
0.07	2546	22	F
0.088	2313	18.4	F
0.069	2360	17.9	F
0.1	2157	18.2	F
0.103	2262	16	F
0.077	2146	19.5	F
0.101	2221	21.2	F
0.12	2308	21	F
0.069	2240	23	F
0.097	1949	12.2	F
0.107	1988	13.6	F
0.087	1816	13.4	F
0.089	2572	17.9	F
0.073	2295	15.5	F
0.078	2295	16	F
0.106	1990	12.8	F
0.097	2527	13.9	F
0.102	1980	12.8	F
0.09	2572	16.5	F
0.082	2281	17.9	F
0.096	2113	13.7	F
0.081	2058	11.3	F
0.081	2205	10.9	F
0.079	1988	12.1	F
0.09	2004	14.6	F
0.063	2010	16.6	F
0.042	1962	19	F
0.101	1523	13.4	F
0.093	2344	20.6	F
0.12	1916	11.8	F
0.092	2625	13.1	F
0.084	2057	20.3	F
0.102	2139	19.8	F
0.124	2123	12.1	F
0.099	2160	12.8	F
0.108	2371	14.7	F
0.112	1950	13.5	F
0.076	2222	13.8	F
0.087	2175	9.4	F
0.107	2292	16.7	F
0.103	2284	12	F
0.07	2282	14.7	F
0.094	2238	12.2	F
0.083	2187	10.4	F
0.086	2111	12	F
0.102	2379	12.6	F
0.092	2455	10.4	F
0.123	1600	13.8	F
0.098	1714	13.8	F
0.125	1798	13.6	F
0.126	1803	16.1	F
0.109	2359	14.5	F
0.139	1599	14.4	F
0.119	1759	16.2	F
0.108	2339	10.9	F
0.235	2308	13.7	F
0.06	1569	17.5	F
0.109	1435	19.3	F
0.091	1844	15.1	F
0.106	1928	12.2	F
0.093	1766	20.6	F
0.122	1798	17.5	F
0.095	2058	9.9	F
0.117	1216	16.7	F
0.074	1842	28.3	F
0.073	1778	33.6	F
0.078	1772	21.7	F
0.157	1529	31.8	F
0.2	1741	36.5	F
0.091	1824	30.6	F
0.086	1888	29	F
0.095	1881	32.9	F
0.094	1669	31.4	F
0.077	1632	28.2	F
0.084	1872	31.9	F
0.08	1955	29.2	F
0.11	1686	27.4	F
0.076	1768	33	F
0.081	1745	28.1	F
0.063	1895	29.6	F
0.092	1937	32.3	F
0.072	2120	31.3	F
0.073	1668	28.4	F
0.026	1734	27.4	F
0.032	2187	37.8	F
0.03	2028	34.4	F
0.034	1633	34.5	F
0.034	2186	39.7	F
0.031	1630	40.1	F
0.04	1739	37.3	F
0.071	1790	29	F
0.033	1967	31.4	F
0.032	1788	39.4	F
0.04	1698	35.3	F
0.028	1565	33.1	F
0.017	1654	26.6	F
0.03	2314	40	M
0.031	2238	34.3	M
0.035	2212	31.2	M
0.036	2314	29.9	M
0.035	2233	36.3	M
0.037	2256	35.2	M
0.032	2154	33.2	M
0.032	2257	41.4	M
0.03	1905	32.2	M
0.029	1884	29	M
0.048	2139	50.9	M
0.039	2046	46.4	M
0.024	2030	39.4	M
0.03	2209	49.1	M
0.03	2549	57.5	M
0.051	1811	61.1	M
0.013	1799	45.9	M
0.02	1915	48.5	M
0.027	2115	47.4	M
0.032	2364	48.4	M
0.027	2278	46.8	M
0.029	1984	40	M
0.035	1906	40.9	M
0.036	1810	39.4	M
0.029	1671	41.6	M
0.027	1771	41	M
0.024	1767	43.5	M
0.028	2446	51.4	M
0.023	2109	48.8	M
0.015	2291	49.6	M
0.032	2212	43.7	M
0.031	2260	44.1	M
0.039	2254	46.8	M
0.036	2146	40.6	M
0.029	1689	43.4	M
0.032	2320	53.2	M
0.027	1521	54.9	M
0.027	1764	59.4	M
0.046	1851	52.2	M
0.037	2313	41.4	M
0.021	2245	42.8	M
0.019	1957	42.8	M
0.032	2028	35.8	M
0.026	2095	35.5	M
0.027	1954	44.7	M
0.016	2507	46.6	M
0.023	2543	39.8	M
0.02	1598	41.3	M
0.028	2397	41.4	M
0.043	1974	25.1	M
0.026	2156	45.2	M
0.029	2520	37.7	M
0.035	2347	31.8	M
0.032	2271	35.4	M
0.022	1774	38	M
0.019	1595	43.3	M
0.021	1637	30.7	M
0.022	1536	34.2	M
0.031	2067	40.1	M
0.036	2056	44.2	M
0.025	2048	33.5	M
0.026	2184	33.6	M
0.031	1825	36.8	M
0.031	2222	35	M
0.037	2073	35.8	M
0.033	1762	37.4	M
0.028	1867	40.3	M
0.039	1940	39.6	M
0.03	1801	46.9	M
0.039	2023	46.8	M
0.028	1914	38.1	M
0.025	1961	45.1	M
0.018	256	29.4	M
0.013	253	33.6	M
0.018	428	30	M
0.014	389	23.1	M
0.014	472	24.9	M
0.016	530	21	M
0.013	809	38.4	M
0.015	363	36.3	M
0.014	436	38.8	M
0.018	658	43.8	M
0.012	768	35.6	M
0.013	723	39.8	M
0.016	699	37.2	M
0.015	1099	47.8	M
0.012	1371	39.4	M
0.011	1035	31	M
0.01	1006	37.7	M
0.012	902	35.2	M
0.012	931	35.2	M
0.013	1281	41.8	M
0.015	1079	38.6	M
0.014	447	42.6	M
0.012	362	43.1	M
0.012	1246	40.2	M
0.013	943	38.9	M
0.012	1332	38.8	M
0.012	892	48.7	M
0.013	1093	43.7	M
0.012	380	48.8	M
0.014	835	40.9	M
0.019	1290	52.3	M
0.017	1075	43.2	M
0.015	492	34.4	M
0.012	937	34.2	M
0.013	975	38.3	M
0.015	779	38.7	M
0.012	1084	34.8	M
0.015	1159	31	M
0.015	1296	33.1	M
0.016	1184	29.9	M
0.015	403	39.7	M
0.013	454	40.4	M
0.015	411	47.9	M
0.025	1232	35.9	M
0.014	1430	40.4	M
0.013	1359	41	M
0.014	869	52.2	M
0.016	1261	32.6	M
0.013	1608	39.9	M
0.015	1287	33	M
0.013	1204	34.2	M
0.012	1336	40.2	M
0.013	1588	38.1	M
0.015	1155	47.8	M
0.023	1165	45.8	M
0.014	1162	42.1	M
0.023	1465	46	M
0.013	1461	47.3	M
0.011	1488	38.1	M
0.012	1106	34.5	M
0.013	688	48.1	M
0.012	742	43.6	M
0.014	941	40.7	M
0.012	1191	34.9	M
0.013	961	38.9	M
0.012	1083	41.3	M
0.014	637	37.4	M
0.024	1715	38.8	M
0.082	2278	20.5	M
0.07	2194	14.4	M
0.082	2075	15.4	M
0.065	2123	22.7	M
0.085	1954	15.7	M
0.099	2406	22.1	M
0.087	2163	21.9	M
0.134	2207	29.9	M
0.088	2142	22.8	M
0.071	2400	23.8	M
0.074	2519	18.7	M
0.093	2425	16.3	M
0.081	2198	14.6	M
0.084	2382	18.8	M
0.147	1766	16.3	M
0.093	1970	15.2	M
0.076	2374	17.9	M
0.087	2136	21.1	M
0.117	1788	22.8	M
0.108	2314	16.9	M
0.077	1984	19.6	M
0.101	2482	16.4	M
0.107	1713	18.4	M
0.111	1935	12.5	M
0.087	2112	12.4	M
0.131	2072	14	M
0.13	2060	15	M
0.075	1953	13.7	M
0.106	2628	13.1	M
0.092	2254	19.8	M
0.077	2336	16.7	M
0.075	2369	13.8	M
0.085	2286	17.3	M
0.109	2034	21.7	M
0.078	1861	16.1	M
0.119	2206	17.9	M
0.124	2037	19.3	M
0.087	2311	20.9	M
0.105	2146	13.3	M
0.091	1885	10.4	M
0.08	2116	11.4	M
0.094	2112	12.2	M
0.085	2053	13.4	M
0.082	2058	12.5	M
0.097	2006	11.6	M
0.074	1963	14.3	M
0.092	2369	16.1	M
0.077	1942	11.6	M
0.098	1861	11.8	M
0.127	1803	14.9	M
0.117	1871	22.9	M
0.114	1889	20.8	M
0.072	2208	26.5	M
0.058	2051	23.8	M
0.118	1863	15.5	M
0.132	2256	20.2	M
0.088	2147	21.2	M
0.078	1978	12.3	M
0.096	2110	18.7	M
0.113	2244	16.2	M
0.114	2281	16.6	M
0.126	2047	21.1	M
0.067	1953	15.7	M
0.14	2267	16.4	M
0.112	2244	12.4	M
0.103	2195	19.2	M
0.079	2071	15.3	M
0.088	2100	21.6	M
0.117	2239	17.1	M
0.072	1957	21.4	M
0.28	1911	22.5	M
0.109	2053	12.9	M
0.109	2019	13.3	M
0.119	2051	15.8	M
0.09	2035	9.2	M
0.115	1950	10.6	M
0.107	1765	17.9	M
0.198	1708	23.5	M
0.178	2126	19.7	M
0.11	2152	13	M
0.128	2189	13.1	M
0.056	1390	21	M
0.105	1994	11.6	M
0.092	2388	19.6	M
0.111	2343	14.6	M
0.098	2433	17.1	M
0.108	2155	23.2	M
0.097	2186	18.7	M
0.103	2164	13.8	M
0.169	2048	14	M
0.108	2287	11.6	M
0.085	2142	10.9	M
0.091	2192	11.2	M
0.089	1909	9.7	M
0.072	2260	19.4	M
0.138	2307	25.6	M
0.085	2225	21.9	M
0.084	2090	14.2	M
0.08	2315	13	M
0.112	1831	15.7	M
0.078	2189	21.8	M
0.166	2319	20.6	M
0.079	2336	23.4	M
0.102	2212	21.8	M
0.109	1680	14.5	M
0.086	2144	16.8	M
0.079	2246	21.4	M
0.103	2333	17.9	M
0.103	1875	13.3	M
0.08	2216	14.7	M
0.085	2198	14.7	M
0.083	2242	16.1	M
0.097	2183	15.8	M
0.114	1725	17.2	M
0.117	1783	16.5	M
0.053	1744	15.7	M
0.038	1769	41.1	M
0.028	1728	38.5	M
0.025	1861	44.8	M
0.021	1659	36.7	M
